# Supplementary material for: MEDEA randomised intervention study protocol in Cyprus, Greece and Israel for mitigation of desert dust health effects in adults with atrial fibrillation
Source: PubMed Central journal article supplement — BMJ Open. 2023 Mar 23;13(3):e069809. doi: 10.1136/bmjopen-2022-069809 (PMC10040014; doi:10.1136/bmjopen-2022-069809), 2023-03-23
Supplement: bmjopen-2022-069809.draft_revisions.pdf [file bmjopen-2022-069809.draft_revisions.pdf]

# BMJ Open

BMJ Open is committed to open peer review. As part of this commitment we make the peer review history of every article we publish publicly available.

When an article is published we post the peer reviewers' comments and the authors' responses online. We also post the versions of the paper that were used during peer review. These are the versions that the peer review comments apply to.

The versions of the paper that follow are the versions that were submitted during the peer review process. They are not the versions of record or the final published versions. They should not be cited or distributed as the published version of this manuscript.

BMJ Open is an open access journal and the full, final, typeset and author-corrected version of record of the manuscript is available on our site with no access controls, subscription charges or pay-per-view fees (<http://bmjopen.bmj.com>).

If you have any questions on BMJ Open's open peer review process please email [info.bmjopen@bmj.com](mailto:info.bmjopen@bmj.com)

# BMJ Open

## The MEDEA randomized intervention study protocol for mitigation of desert dust health effects in adults with atrial fibrillation

|                                                                                                                                                                                                     |                                                                                                                                                                                                                                                                                                                                                                                                                                                                                                                                                                                                                                                                                                                                                                                                                                                                                                                                                                                                                                                                                                                                                                                 |
|-----------------------------------------------------------------------------------------------------------------------------------------------------------------------------------------------------|---------------------------------------------------------------------------------------------------------------------------------------------------------------------------------------------------------------------------------------------------------------------------------------------------------------------------------------------------------------------------------------------------------------------------------------------------------------------------------------------------------------------------------------------------------------------------------------------------------------------------------------------------------------------------------------------------------------------------------------------------------------------------------------------------------------------------------------------------------------------------------------------------------------------------------------------------------------------------------------------------------------------------------------------------------------------------------------------------------------------------------------------------------------------------------|
| Journal:                                                                                                                                                                                            | <i>BMJ Open</i>                                                                                                                                                                                                                                                                                                                                                                                                                                                                                                                                                                                                                                                                                                                                                                                                                                                                                                                                                                                                                                                                                                                                                                 |
| Manuscript ID                                                                                                                                                                                       | bmjopen-2022-069809                                                                                                                                                                                                                                                                                                                                                                                                                                                                                                                                                                                                                                                                                                                                                                                                                                                                                                                                                                                                                                                                                                                                                             |
| Article Type:                                                                                                                                                                                       | Protocol                                                                                                                                                                                                                                                                                                                                                                                                                                                                                                                                                                                                                                                                                                                                                                                                                                                                                                                                                                                                                                                                                                                                                                        |
| Date Submitted by the Author:                                                                                                                                                                       | 03-Nov-2022                                                                                                                                                                                                                                                                                                                                                                                                                                                                                                                                                                                                                                                                                                                                                                                                                                                                                                                                                                                                                                                                                                                                                                     |
| Complete List of Authors:                                                                                                                                                                           | Anagnostopoulou, Pinelopi; University of Cyprus<br>Kouis, Panayiotis; University of Cyprus<br>Papatheodorou, Stefania ; Harvard TH Chan School of Public Health<br>Middleton, Nicos; Cyprus University of Technology, Department of Nursing<br>Papasavvas, Ilias; Nicosia General Hospital, Department of Cardiology<br>Avraamides, Panayiotis; Nicosia General Hospital, Department of Cardiology<br>Simantirakis, Emmanuel; University Hospital of Heraklion, Cardiology Department, Heraklion, Crete, Greece<br>Anastasiou, Ioannis; University Hospital of Heraklion, Cardiology Department, Heraklion, Crete, Greece<br>Novack, Victor; Clalit Health Services<br>Stamatelatos, Gerasimos; E.n.A Consulting LP, Arachova Boeotia, Greece<br>Revas, Efstathios; E.n.A Consulting LP, Arachova Boeotia, Greece<br>Kaniklides, Christos; Cyprus Broadcasting Corporation<br>Tymvios, Filippos; Rural Development and Environment, Department of Meteorology<br>Savvides, Chrysanthos; Ministry of Labour and Social Insurance, Department of Labour Inspection<br>Koutrakis, Petros; Harvard TH Chan School of Public Health<br>Yiallourous, Panayiotis; University of Cyprus |
| Keywords:                                                                                                                                                                                           | Pacing & electrophysiology < CARDIOLOGY, Health policy < HEALTH SERVICES ADMINISTRATION & MANAGEMENT, Public health < INFECTIOUS DISEASES, PREVENTIVE MEDICINE                                                                                                                                                                                                                                                                                                                                                                                                                                                                                                                                                                                                                                                                                                                                                                                                                                                                                                                                                                                                                  |
| <p>Note: The following files were submitted by the author for peer review, but cannot be converted to PDF. You must view these files (e.g. movies) online.</p> <p>Video S1.mov<br/>Video S2.mov</p> |                                                                                                                                                                                                                                                                                                                                                                                                                                                                                                                                                                                                                                                                                                                                                                                                                                                                                                                                                                                                                                                                                                                                                                                 |

1  
2  
3  
4  
5  
6  
7  
8  
9  
10  
11  
12  
13  
14  
15  
16  
17  
18  
19  
20  
21  
22  
23  
24  
25  
26  
27  
28  
29  
30  
31  
32  
33  
34  
35  
36  
37  
38  
39  
40  
41  
42  
43  
44  
45  
46  
47  
48  
49  
50  
51  
52  
53  
54  
55  
56  
57  
58  
59  
60

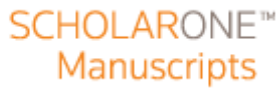

**Title: The MEDEA randomized intervention study protocol for mitigation of desert dust health effects in adults with atrial fibrillation**

**List of Authors:**

Pinelopi Anagnostopoulou MD, PhD<sup>1</sup>([anagnostopoulou.pinelopi@ucy.ac.cy](mailto:anagnostopoulou.pinelopi@ucy.ac.cy))

Panayiotis Kouis PhD<sup>1</sup> ([kouis.panayiotis@ucy.ac.cy](mailto:kouis.panayiotis@ucy.ac.cy))

Stefania I. Papatheodorou MD, PhD<sup>2</sup> ([spapathe@hsph.harvard.edu](mailto:spapathe@hsph.harvard.edu))

Nicos Middleton, PhD<sup>3</sup> ([nicos.middleton@cut.ac.cy](mailto:nicos.middleton@cut.ac.cy))

Ilias Papasavvas<sup>4</sup> MD ([ilipapa@icloud.com](mailto:ilipapa@icloud.com))

Panayiotis Avraamides<sup>4</sup> MD ([pavraamides@mphs.moh.gov.cy](mailto:pavraamides@mphs.moh.gov.cy))

Emmanuel Simantirakis MD, PhD<sup>5</sup> ([esimant@med.uoc.gr](mailto:esimant@med.uoc.gr))

Ioannis Anastasiou, MD, PhD<sup>5</sup> ([ioannisaanastassiou@yahoo.gr](mailto:ioannisaanastassiou@yahoo.gr))

Victor Novack MD, PhD<sup>6</sup> ([victorno@clalit.org.il](mailto:victorno@clalit.org.il))

Gerasimos Stamatelatos, MSc<sup>7</sup> ([makis.stamatelatos@enaconsulting.gr](mailto:makis.stamatelatos@enaconsulting.gr))

Efstathios Revvas, MSc<sup>7</sup> ([stathis.revvas@enaconsulting.gr](mailto:stathis.revvas@enaconsulting.gr))

Christos Kaniklides, BSc<sup>8</sup> ([christos.kaniklides@cybc.com.cy](mailto:christos.kaniklides@cybc.com.cy))

Filippos Tymvios, PhD<sup>9</sup> ([filippos@me.com](mailto:filippos@me.com))

Chrysanthos Savvides PhD<sup>10</sup> ([csavvides@dli.mlsi.gov.cy](mailto:csavvides@dli.mlsi.gov.cy))

Koutrakis Petros PhD<sup>11</sup> ([petros@hsph.harvard.edu](mailto:petros@hsph.harvard.edu))

Panayiotis K. Yiallourous MD, PhD<sup>1</sup> ([yiallourous.panayiotis@ucy.ac.cy](mailto:yiallourous.panayiotis@ucy.ac.cy))

**Affiliations:** <sup>1</sup>Medical School, University of Cyprus, Nicosia, Cyprus

<sup>2</sup>Department of Epidemiology, Harvard T.H. Chan School of Public Health, Harvard University, Boston, MA, USA.

<sup>3</sup>Department of Nursing, Cyprus University of Technology, Limassol, Cyprus

<sup>4</sup>Department of Cardiology, Nicosia General Hospital, Nicosia, Cyprus

<sup>5</sup>University Hospital of Heraklion, Cardiology Department, Heraklion, Crete, Greece

<sup>6</sup>Soroka University Medical Center (SUMC), Clalit Health Services, Israel

<sup>7</sup>E.n.A Consulting LP, Arachova Boeotia, Greece

1  
2  
3  
4  
5  
6  
7  
8  
9  
10  
11  
12  
13  
14  
15  
16  
17  
18  
19  
20  
21  
22  
23  
24  
25  
26  
27  
28  
29  
30  
31  
32  
33  
34  
35  
36  
37  
38  
39  
40  
41  
42  
43  
44  
45  
46  
47  
48  
49  
50  
51  
52  
53  
54  
55  
56  
57  
58  
59  
60

<sup>8</sup>Cyprus Broadcasting Corporation, Nicosia, Cyprus

<sup>9</sup>Department of Meteorology, Ministry of Agriculture, Rural Development and Environment, Nicosia, Cyprus

<sup>10</sup>Department of Labour Inspection, Ministry of Labour and Social Insurance, Nicosia, Cyprus

<sup>11</sup>Harvard TH Chan School of Public Health, Boston, USA

**Correspondence:**

Panayiotis K. Yiallourous MD, PhD

Shakolas Educational Center of Clinical Medicine

Palaios Dromos Lefkosias-Lemesou 215/6

2029, Aglantzia Nicosia

Telephone No: +357 99470033, Fax No: +357 22895396

Email: [yiallourous.panayiotis@ucy.ac.cy](mailto:yiallourous.panayiotis@ucy.ac.cy)

**ABSTRACT (299 words)****Introduction:**

Mediterranean countries experience frequent desert dust storm (DDS) events originating from neighbouring Sahara and Arabian deserts, which are associated with significant increase in mortality and hospital admissions, mostly from cardiovascular and respiratory diseases. Short-term exposure to ambient air pollution is considered as a trigger for symptomatic exacerbations of pre-existing paroxysmal atrial fibrillation (AF) and other types of heart arrhythmia. The MEDEA clinical randomised intervention study in adults with AF is funded by EU LIFE+ program to evaluate the efficacy of recommendations aiming to reduce exposure to desert dust and related heart arrhythmia effects.

**Methods and analysis:**

The study is performed in three heavily exposed to desert dust regions of the Eastern Mediterranean: Cyprus, Israel, and Crete-Greece. Adults with paroxysmal AF and implanted pacemaker are recruited and randomized to three parallel groups: a) no intervention, b) interventions to reduce outdoor exposure to desert dust, c) interventions to reduce both outdoor and indoor exposure to desert dust. Eligible participants are enrolled on a web-based platform which communicates, alerts and makes exposure reduction recommendations during DDS events. Exposure changes are assessed by novel tools (smartwatches with GPS and physical activity sensors, air pollution samplers assessing air quality inside and outside participant's homes, etc). Primary clinical outcomes include the AF burden expressed as the percentage of time with paroxysmal AF over the total study period, the incidence of ventricular arrhythmia episodes as recorded by the participants' pacemakers or cardioverters/defibrillators and the disease-specific Atrial Fibrillation Effect on Quality-of-Life (AFEQT) questionnaire.

**Ethics and dissemination:**

Local bioethics' authorities approved the study at all sites, according to national legislations. The findings will be publicised in peer-reviewed scientific journals, in international conferences, and in

1  
2  
3 professional websites and newsletters. A summary of the results and participants' interviews will be  
4  
5 included in a documentary in English, Greek and Hebrew.  
6  
7

8 **Registration details:** ClinicalTrials.gov Identifier: NCT03503812, April 18, 2019  
9  
10

## 11 12 13 14 **STRENGTHS AND LIMITATIONS OF THIS STUDY** 15

- 16  
17  
18 - The study will assess for the first time, the compliance of a vulnerable population group to  
19 commonly issued recommendations for reduction of exposure to Desert Dust Storm (DDS) using  
20 personal monitoring through wearable sensors.  
21  
22 - The study will assess the impact of using air cleaning devices on indoor air quality in homes of  
23 adults with Atrial Fibrillation (AF) during DDS events.  
24  
25 - The study will use validated tools to assess a series of health outcomes including AF burden and  
26 disease-specific health-related quality of life.  
27  
28 - AF patients are often of advanced age and may be constrained by other co-morbidities (e.g.  
29 impaired vision) that may compromise the use of wearable devices and smartphones.  
30  
31  
32  
33  
34  
35  
36  
37  
38  
39  
40

41 **Key words:** Desert Dust, Asian Dust, Atrial Fibrillation, Public Health Intervention, Sensors  
42  
43  
44  
45  
46  
47  
48  
49  
50  
51  
52  
53  
54  
55  
56  
57  
58  
59  
60

## INTRODUCTION

Exposure to air pollution is a well-established risk factor for cardiorespiratory morbidity and mortality [1, 2]. Among other outcomes, exposure to particulate matter is associated with higher incidence of cardiac infarction [3] and ventricular arrhythmias [4]. Furthermore, ambient air pollution is also associated with atrial fibrillation (AF), the most common heart rate disturbance, affecting almost 2% of the population worldwide, and a known risk factor for heart failure, stroke, hospital admission, and mortality [5-8].

Although the evidence on the relationship between particulate matter and incidence of heart arrhythmias comes from studies of anthropogenic particulate pollution (road traffic, industry, etc), particulate pollution in urban settlements may have substantial contributions from non-anthropogenic sources, such as Desert Dust Storms (DDS) [9]. This is very common for regions with geographical proximity to the global desert dust belt, such as the Mediterranean basin. In Mediterranean countries, DDS events may appear in more than 15% of the days of the year with the greater frequency and intensity of the events recorded in the south-eastern Mediterranean [10, 11].

Despite the natural origin of DDS events, recent evidence supports their strong association with adverse health outcomes such as increased all-cause and cause specific mortality and morbidity [12-16]. Even though, direct evidence linking the incidence of AF episodes with DDS exposure is still lacking, recent studies have identified short term exposure to ambient air pollution as a trigger for AF episodes [17-19].

The current public health strategy across many countries during anthropogenic high pollution events is to issue alerts or warnings to the population, targeting vulnerable groups such as the known cardiac patients. These alerts usually are accompanied by recommendations to avoid vigorous outdoor activity and stay indoors during the events [20, 21]. Although there is a well-established rationale behind these recommendations [22], adherence has been found to vary widely, depending on several personal and other parameters [23]. In the case of DDS events a similar strategy of alerts and recommendations is followed on their appearance [20], but to date there is no real-life evidence supporting the efficacy of



1  
2  
3 these recommendations in reducing personal exposure to dust, either in the outdoor or the indoor  
4 environments, not or their role in mitigating the related health risks.  
5  
6

7  
8 The “MEDEA (Mitigating the Health Effects of Desert Dust Storms Using Exposure-Reduction  
9 Approaches) Atrial Fibrillation study” has been designed to study the feasibility and effectiveness of  
10 simple exposure reduction recommendations (including behavioural changes and/or use of indoor air  
11 cleaners vs no intervention) in a randomised cohort of AF patients in parallel groups during DDS events  
12 in South-Eastern Mediterranean countries. This interventional study will quantify the impact of these  
13 recommendations both in terms of change in personal exposure to air pollution and in terms of AF  
14 burden reduction and improvement in Health-Related Quality of Life (HRQoL). The project is carried  
15 out by an eight-partner consortium across three heavily DDS-exposed sites in the Eastern  
16 Mediterranean, Cyprus, Israel, and Crete-Greece.  
17  
18  
19  
20  
21  
22  
23  
24  
25  
26  
27  
28  
29  
30

## 31 **METHODS AND ANALYSIS**

32  
33  
34 The SPIRIT checklist has been used for this report [24].  
35  
36

### 37 ***Population***

38  
39  
40 The target population are men and women with AF and previously implanted dual lead (atrial and  
41 ventricular) pacemaker or implantable cardioverter- defibrillator (ICD), who attend the heart arrhythmia  
42 clinics at Nicosia General Hospital in Cyprus, Soroka Clinical Research Center (SCRC) in Beer-Sheba,  
43 Israel and University Hospital of Heraklion, Crete, Greece. Additional details on the recruitment of  
44 participants are provided in Supplementary Material. Screening of the AF patients at each site started  
45 in Fall 2018 and MEDEA personnel continues to identify and follow-up eligible AF patients throughout  
46 the three follow-up periods in 2019, 2021 and 2022. The SPIRIT flow diagram for the AF study is  
47 presented in Figure 1.  
48  
49  
50  
51  
52  
53  
54  
55  
56  
57

### 58 ***Eligibility criteria***

1  
2  
3 Eligible for the study are patients with permanent atrial or dual chamber pacemakers or ICDs implanted  
4  
5 at least two months prior to randomization, with:

- 6  
7 a. History of paroxysmal AF and  
8  
9 b. Detection of AF episodes in pacemaker/ICD monitoring of >6 min in duration.  
10

11 The study puts no limitations on patients' medication regimens during the study period.

12  
13 Exclusion criteria are permanent AF, reversible causes of AF, terminal illness, or not living at least 5  
14  
15 days per week in the same household.  
16

### 17 18 19 20 ***Study design***

21  
22 Patients are randomized with a 1:1:1 ratio, using a random assignment tool, into three parallel groups:  
23  
24 *Group 1*; no additional intervention during DDS ('business as usual' scenario), *Group 2*; interventions  
25  
26 for outdoor exposure reduction, *Group 3*; combined interventions for both outdoor and indoor exposure  
27  
28 reduction. The study design offers the opportunity to assess a) outdoor exposures to PM, b) indoor  
29  
30 exposures to PM and c) related health outcomes in three parallel groups during the same events of DDS  
31  
32 with and without intervention measures.  
33  
34

### 35 36 ***Study interventions and recommendations***

37  
38 To reduce the outdoor and indoor exposure to DDS pollution, relevant recommendations have been  
39  
40 developed. In brief, for outdoor exposure reduction intervention, it is recommended to the participants  
41  
42 to stay indoors, and avoid any intense physical activity outdoors, competitive sports and unnecessary  
43  
44 walks (Group 2 & Group 3). For indoor exposure reduction intervention, it is recommended to close  
45  
46 doors and windows, to seal possible openings around doors and windows minimizing outdoor air  
47  
48 penetration, and to filter indoor air by using continuously an air cleaning device (Coway Storm 1516D,  
49  
50 Coway, South Korea, see Supplementary Material for further details). Indoor exposure reduction  
51  
52 measures were implemented at the households of the participants in Group 3. In order to enhance uptake  
53  
54 and acceptability of the recommendations, we produced relevant audiovisual spots with animated  
55  
56 guidelines in Greek, Hebrew and English languages. The English version for the outdoor exposure  
57  
58  
59  
60

1  
2  
3 reduction intervention (Group 2, Video S1) and for the outdoor and indoor exposure reduction  
4  
5 intervention (Group 3, Video S2) are available in Supplementary Material.  
6  
7

### 8 *MEDena® Health-Hub*

9

10  
11 For the purposes of the project, a patient-centered web-based platform (the MEDena® Health-Hub) and  
12  
13 a smart phone application (the MEDEApp®) have been developed. These tools receive input from  
14  
15 existing models that forecast DDS events in the countries that take part in the study and provide alerts  
16  
17 to participants and researchers with the appearance of DDS events, coupled with relevant exposure  
18  
19 reduction recommendations (personalized to each participant, according to the randomization group  
20  
21 they belong). Also, by using cloud technologies, they offer the opportunity to store health and exposure  
22  
23 data from all participants, in the intervention and control groups, as these are recorded through the  
24  
25 wearable sensors and online questionnaires.  
26  
27

28  
29 Following randomization, participant's socio-demographic characteristics, medical and medication  
30  
31 history, as well as information on household location and characteristics, are uploaded to the MEDena®  
32  
33 Health-Hub. In addition, a wearable sensor (EMBRACE™ smartwatch (Embrace Tech LTD, Cyprus)  
34  
35 is provided to the participant, who is asked to wear it daily throughout the study period, except during  
36  
37 bedtime, bathing, and swimming. The study personnel are responsible to train the AF patients in the  
38  
39 tools and procedures to be followed during the study. A leaflet with instructions on the use of the  
40  
41 EMBRACE™ smartwatch and MEDEApp is also provided to the participants. Additional details on the  
42  
43 MEDena® Health-Hub and MEDEA App have been published previously [25].  
44  
45  
46

### 47 *Exposure assessment*

48  
49

50  
51 i. Wearable sensors: Physical activity as well as time spent outdoors are assessed by the sensors of the  
52  
53 EMBRACE™ smartwatch. The smartwatch is supplied with global positioning system (GPS), which  
54  
55 records continuously the time the participant spends indoors and outdoors, and activity tracking  
56  
57 (pedometer) hardware and software, which records steps and heart rate. In addition, the smartwatch also  
58  
59 includes an embedded sim card and Wi-Fi connectivity and can be used as a stand-alone device. Lastly,  
60

1  
2  
3 the software can synchronize the sensors, so that data are transferred to the cloud database marked with  
4  
5 the same timestamp.  
6  
7

8  
9 ii. Air pollution sensors: Particle samplers (Harvard High Volume Cascade Impactors, Harvard  
10 University, USA) are placed outside and inside representative participants' houses. Furthermore,  
11 indoor, commercial low volume air quality sensors (OPC-N3 Optical Particle Counters, Alphasense,  
12 United Kingdom) are used to assess the levels of indoor exposure to PM across the three intervention  
13 groups. The indoor and outdoor particle samplers use Teflon filters which are analysed to give the  
14 concentrations of PM<sub>10</sub>, PM<sub>2.5</sub>, black carbon (BC) and elements inside and outside representative houses  
15 during DDS and DDS-free days.  
16  
17  
18  
19  
20  
21  
22

23  
24 iii. Questionnaires: Each participant is asked to complete an activity questionnaire following each DDS  
25 event, which assesses the reported compliance to the recommendations. A schematic diagram of the AF  
26 study is presented in Figure 2.  
27  
28  
29

### 30 31 ***Baseline and Follow-up Clinical Assessments*** 32

33  
34 Eligible AF patients after screening are invited for a baseline clinical assessment, which includes  
35 detailed questions on socio-demographic characteristics, health symptoms, particularly heart  
36 arrhythmias symptoms, utilization of medical care, medication history and household environmental  
37 characteristics, including tobacco smoke exposure. A baseline assessment of the AF/ventricular  
38 arrhythmia episodes is obtained after downloading relevant data from the participants' pacemakers or  
39 ICDs.  
40  
41  
42  
43  
44  
45  
46  
47

48 Follow-up periods span for 6 months and include monitoring of the daily location and physical activity  
49 of AF patients using the smartwatches. Phone interviews at baseline and then at every 1 month  
50 throughout the follow-up period are performed collecting information on heart arrhythmia symptoms  
51 control, medication use, unscheduled visits to health professional for arrhythmias and health related  
52 quality of life using the Atrial Fibrillation Effect on QualiTy-of-Life (AFEQT, license number:  
53 20171404) questionnaire [26]. Incidence of AF/ventricular arrhythmia episodes is recorded daily using  
54  
55  
56  
57  
58  
59  
60

1  
2  
3 the already implanted participants' pacemaker or ICD during the follow-up period. The recorded  
4 episodes are downloaded by interrogation of the pacemaker or ICD after the end of the study period  
5 during a visit to the Hospital Arrhythmia Clinic. The timeline and description of baseline and follow-  
6 up assessments in the AF panel study are presented in Figure 3. Non-participation to the clinical visits  
7 was the only reason for discontinuation of the study participation. Additional details on the intervention  
8 implementation are provided in Supplementary Material.  
9  
10  
11  
12  
13  
14

### 15 16 *Atrial fibrillation outcomes and data analysis*

17  
18  
19  
20 The primary health outcome in the AF clinical study is a 20% reduction in AF burden defined as the  
21 percentage of time with AF during the whole study period. For the primary analysis, we will compare  
22 the combined effect in the two intervention groups versus the control group. Next, we will make  
23 comparisons between each of the intervention groups and the control group and between the  
24 intervention groups. Furthermore, for health-related quality of life, changes equal or greater than ( $\pm$ ) 5  
25 points in the AFEQT questionnaire score are considered clinically significant. Other health outcomes  
26 include the presence or absence of arrhythmia symptoms in the prior 4-week period, arrhythmia  
27 medication use and unscheduled hospital visits for heart arrhythmias.  
28  
29  
30  
31  
32  
33  
34  
35

36  
37 i. Sample size calculation: There are no studies that evaluated the reduction in AF burden attributed to  
38 the reduction in exposure to ambient air pollution. Nevertheless, assuming a follow-up period for 6  
39 months and an effect size of 20% change in the outcome, a study sample size of 118 is required to  
40 demonstrate a statistically significant result. This number is estimated for performing a two-way  
41 repeated measures ANOVA statistical test for the comparison of the intervention and control groups  
42 and assuming an alpha value at 0.05, power of 80% and a 50% correlation between repeated  
43 measurements.  
44  
45  
46  
47  
48  
49  
50

51  
52 ii. Statistical analysis plan: Descriptive statistics will be presented using summaries of key variables in  
53 the form of mean (standard deviation) and median (range) for normally and non-normally distributed  
54 variables respectively. For categorical variables, the distribution in percentages will be presented.  
55 Comparisons between intervention and control groups will be carried out using the two-way repeated  
56 measures ANOVA statistic test for continuous variables and the Chi-Square test for categorical  
57  
58  
59  
60

1  
2  
3 variables. The statistical analysis for the impact of intervention on health-related quality of life (AFEQT  
4 score) will rely on a linear mixed effects (hierarchical) regression model which will include fixed effects  
5 for intervention group and subject-specific random intercepts. The model will be adjusted for several  
6 covariates including age, gender, year of study, site of study and climatic factors.  
7  
8  
9

## 10 11 12 13 14 **ETHICS AND DISSEMINATION**

15  
16  
17 The MEDEA AF panel study has been approved by national authorities at all sites. In Cyprus, approvals  
18 have been obtained from the Cyprus National Bioethics Committee (EEBK EΠ 2017.01.141), by the  
19 Data Protection Commissioner (No. 3.28.223) and Ministry of Health (No 5.34.01.7.2E). In Greece,  
20 approvals have been obtained from the Scientific Committee (25/04/2018, No: 1748) and the Governing  
21 Board of the University General Hospital of Heraklion (25/22/08/2018). In Israel, approval has been  
22 obtained from the Institutional Review Board (“Helsinki committee”) of the Soroka University Medical  
23 Center (No 0374-17-SOR). Participants sign the informed consent from the corresponding center at  
24 recruitment. The study has been registered and approved by the clinicaltrials.gov online repository  
25 (ClinicalTrials.gov Identifier: NCT03503812)  
26  
27  
28  
29  
30  
31  
32  
33  
34  
35

### 36 37 *Dissemination plan*

38  
39  
40 The study findings will be disseminated according to the predefined dissemination plan of the LIFE  
41 MEDEA project. The project dissemination plan includes publication of the study findings in  
42 international peer reviewed scientific journals, as well as international scientific conferences, with  
43 authorship eligibility as defined by the International Committee of Medical Journal Editors  
44 recommendations. In addition, the findings will be also communicated to the scientific community,  
45 regulatory authorities, patient organizations and the general public through publication of a series of  
46 short-piece articles for professional websites and newsletters, as well as through the organization of  
47 educational activities and open public fairs in the three study sites. Lastly, the LIFE MEDEA project  
48 dissemination plan also includes the production of 50-minute documentary with a summary of the study  
49 findings that will be made available in English, Greek and Hebrew languages. The anonymised study  
50  
51  
52  
53  
54  
55  
56  
57  
58  
59  
60

1  
2  
3 dataset and the statistical code will be made available online in an appropriate, open access, public  
4  
5 repository.  
6  
7

### 8 *Patient and Public Involvement*

9

10  
11 The above-mentioned documentary will include interviews from study participants and participating  
12  
13 clinicians reporting their experiences during the study.  
14  
15

## 16 **DISCUSSION**

17  
18  
19

20  
21  
22 The MEDEA Atrial Fibrillation panel study represents the first comprehensive effort to assess the  
23  
24 efficacy of simple and sustainable recommendations in reducing exposure to desert dust and mitigating  
25  
26 associated health effects among a susceptible population subgroup, such as the AF patients. The study  
27  
28 benefits from a series of novel environmental exposure assessment tools such as smartwatches equipped  
29  
30 with GPS and physical activity sensors that enable the objective assessment of personal compliance to  
31  
32 the recommendations, while the availability of indoor and outdoor air pollution samplers allows the  
33  
34 quantification of outdoor and indoor air pollution exposure among the study population.  
35  
36

37  
38 In the past, several studies focusing on air pollution health effects were characterised by important  
39  
40 misclassifications in exposure assessment. More specifically, exposure to air pollutants was estimated  
41  
42 based on measurements carried out at central air quality monitoring stations that are usually sparsely  
43  
44 distributed across the urban environment and may not adequately represent the variability of air  
45  
46 pollution exposures across residential areas [27]. In addition, reliance on ambient air quality monitoring  
47  
48 stations presumes that outdoor air pollution levels constitute an appropriate proxy for overall air  
49  
50 pollution exposure. However, in these approaches, information on indoor air pollution concentrations  
51  
52 is not taken into account and as a result, the risk for exposure misclassification is high [28-30].  
53  
54 Furthermore, in several previous studies, investigators relied on residential addresses to estimate  
55  
56 personal exposure estimates without taking into consideration the participants' daily activity and  
57  
58 mobility profile [31-33]. In the present study, we rely on a combination of indoor and outdoor samplers  
59  
60

1  
2  
3 in representative premises and installation of commercial low volume air quality sensors across the  
4 three intervention groups to estimate air pollutant concentrations at the residential level without relying  
5 on the air quality monitoring network at the three sites. Moreover, the use of wearable GPS and activity  
6 sensors for the continuous and objective assessment of the physical activity levels and the time  
7 participants spend indoors and outdoors can be coupled with the measurements collected from the  
8 indoor and outdoor air pollution samplers to provide a much higher spatiotemporal accuracy for  
9 personal air pollution exposure. Collectively, the employed methods allow for the objective assessment  
10 of personal compliance to MEDEA recommendations, while at the same time the risk for exposure  
11 misclassification in air pollution exposure estimates due to uncertainties related to the variability of  
12 human mobility and lack of information on indoor air pollution levels are significantly reduced.  
13  
14

15  
16 Similarly, health effects of desert dust exposure are usually relying on administrative and retrospective  
17 data, employing an ecological study design. These data are usually restricted to deaths or hospital  
18 admissions, emergency department visits and 'outpatient clinics' visits [12-16]. However, these  
19 morbidity metrics may be influenced by subjective health care seeking behavior and are not adequate  
20 for the evaluation of the onset, duration and severity of an outcome [34]. In the MEDEA AF panel  
21 study, we assess prospectively a range of clinical outcomes in both the control and interventions groups.  
22 In particular, the AF panel study benefits from the analysis of arrhythmia recordings downloaded from  
23 previously implanted pacemakers, enabling us to determine the start and duration of all events, even the  
24 asymptomatic ones. In addition, the systematic collection of data on additional outcomes such as disease  
25 specific HRQoL, offers the possibility to address additional aspects of the patient's wellbeing and  
26 whether these can be improved as a result of the MEDEA recommendations.  
27  
28

29  
30 One of the main and earliest challenges of the project, was the need to ensure data accuracy and  
31 reliability through the selection of an appropriate wearable device. Usage of smart devices requires a  
32 certain degree of technological literacy, which is challenging, especially in the older population of the  
33 AF patients. In addition to age-group applicability, among other criteria, the memory capacity and  
34 energy efficiency of the device had also to be considered, as these may affect the credibility of the  
35 collected data [35]. In order to overcome this issue, we evaluated several commercially available smart  
36  
37  
38  
39  
40  
41  
42  
43  
44  
45  
46  
47  
48  
49  
50  
51  
52  
53  
54  
55  
56  
57  
58  
59  
60



1  
2  
3 watch devices and we chose the LEMFO-LM25 smartwatch equipped with the EMPBRACE™  
4 software (Embrace Tech LTD, Cyprus). This smartwatch does not require manual synchronization with  
5 another device but acts as a stand-alone device that is able to upload data automatically when it gets in  
6 contact with the WI-FI network at the participant's house. Nevertheless, as recent systematic reviews  
7 demonstrated, although commercial smartwatches are overall valid instruments for monitoring activity  
8 and behavior, limitations such as poor suitability for elderly users, as well as battery, memory and data  
9 quality issues are usually present [36, 37]. To address these inherent limitations, we maintain an  
10 extended support system characterized by frequent communication with participants and their families  
11 and implement simple and cost-effective setting adjustments to the device to ensure systematic  
12 activation of the data collection application at regular time intervals, increase battery duration and  
13 ensure uninterrupted operation of smartwatch background process.  
14  
15  
16  
17  
18  
19  
20  
21  
22  
23  
24  
25  
26

27 Finally, we faced another important challenge, as several older types of pacemakers implanted to AF  
28 patients did not store more than 16 arrhythmia episodes. Thus, for the performance of the AF panel  
29 study we rely mainly on patients with implanted ICD's or modern pacemakers such as Advisa (Advisa  
30 DR MRI™ and Advisa SR MRI™, Medtronic, United States) and Adapta (Adapta DR™ and Adapta  
31 SR™, Medtronic, United States). These pacemakers save all fast rate episodes, regardless of the time  
32 interval between interrogations of the device. Furthermore, AF patients are quite often in advanced age  
33 and have other limiting co-morbidities such as impaired vision and arthritis, which may pose difficulties  
34 on the use of the wearable devices and the touchscreen of smartphones. These unforeseen problems  
35 significantly reduced the number of available patients for recruitment at all study sites and as a  
36 contingency measure, we have intensified recruitment efforts and expanded recruitment in smaller  
37 additional arrhythmia clinics in Cyprus.  
38  
39  
40  
41  
42  
43  
44  
45  
46  
47  
48  
49  
50  
51

## 52 LIST OF ABBREVIATIONS

53  
54  
55 **DDS** – Desert Dust Storms

56  
57 **PM<sub>10</sub>** – Particulate Matter <10 µm

58  
59 **PM<sub>2.5</sub>** – Particulate Matter <2.5 µm  
60

1  
2  
3 **AF** – Atrial Fibrillation  
4

5 **GPS** – Global Positioning system  
6

7 **BC** – Black Carbon  
8

9 **ICD** – Implantable Cardioverter-Defibrillator  
10

11 **AFEQT** – Atrial Fibrillation Effect on Quality of Life  
12  
13  
14

### 15 16 17 **AUTHORS' COMPETING INTERESTS** 18

19  
20 The authors declare no conflict of interest  
21  
22

### 23 **FUNDING STATEMENT** 24

25  
26 This work was supported by the LIFE 2016 Programme (LIFE16 CCA/CY/000041) of the European  
27 Commission. The funders had and will not have a role in study design, data collection and analysis,  
28 decision to publish, or preparation of the manuscript. Funder contact info: [easme-life@ec.europa.eu](mailto:easme-life@ec.europa.eu)  
29  
30  
31  
32  
33  
34  
35

### 36 **AUTHORS CONTRIBUTIONS** 37

38  
39 **PK:** Methodology, Investigation, Software, Data curation, Project Administration Writing-Original  
40 draft preparation; **SIP:** Conceptualization, Methodology, Data curation, Writing-Original draft  
41 preparation; **MGK:** Data Curation, Investigation, Visualisation, Writing - Review & Editing; **NM:**  
42 Methodology, Writing - Review & Editing; **IP:** Data curation, Investigation, Writing – Review &  
43 Editing; **VN:** Conceptualization, Methodology, Writing - Review & Editing, Project Administration;  
44 **ES:** Conceptualization, Methodology, Investigation, Resources, Writing - Review & Editing; **GS:**  
45 Conceptualization, Data Curation, Software, Visualisation, Writing - Review & Editing; **CK:**  
46 Visualisation, Resources, Writing - Review & Editing; **ER:** Conceptualization, Data Curation,  
47 Software, Visualisation, Writing - Review & Editing; **FT:** Conceptualization, Methodology, Resources,  
48 Software, Writing - Review & Editing; **CS:** Conceptualization, Methodology, Resources, Writing -  
49  
50  
51  
52  
53  
54  
55  
56  
57  
58  
59  
60

1  
2  
3 Review & Editing; **KP**: Conceptualization, Methodology; Software, Validation, Resources, Writing -  
4  
5 Review & Editing; **PKY**: Conceptualization, Methodology; Software, Validation, Writing - Review &  
6  
7 Editing, Supervision, Funding acquisition.  
8  
9

## 10 11 12 13 **ACKNOWLEDGMENTS**

14  
15  
16 The authors are grateful to the members of the MEDEA Advisory Committee for the continuous  
17  
18 feedback provided to the LIFE MEDEA project, the hospital administrations for their support to carry  
19  
20 out the project and the participants and their family members for their contribution to the project.  
21  
22

## 23 24 25 26 27 28 **REFERENCES**

- 29  
30  
31  
32 1 Di Q, Dai L, Wang Y, et al. Association of short-term exposure to air pollution with mortality in  
33  
34 older adults, *JAMA* 2017;318:2446-56.
- 35  
36 2 Pope III CA, Dockery DW. Health effects of fine particulate air pollution: lines that connect, *J Air*  
37  
38 *Waste Manage Assoc* 2006;56:709-42.
- 39  
40 3 Wu Y, Li M, Tian Y, et al. Short-term effects of ambient fine particulate air pollution on inpatient  
41  
42 visits for myocardial infarction in Beijing, China, *Environmental Science and Pollution Research*  
43  
44 2019;26:14178-83.
- 45  
46 4 Folino F, Buja G, Zanutto G, et al. Association between air pollution and ventricular arrhythmias in  
47  
48 high-risk patients (ARIA study): a multicentre longitudinal study, *The Lancet Planetary Health*  
49  
50 2017;1:e58-64.
- 51  
52 5 Developed with the Special Contribution of the European Heart Rhythm Association (EHRA),  
53  
54 Endorsed by the European Association for Cardio-Thoracic Surgery (EACTS), Authors/Task Force  
55  
56 Members, et al. Guidelines for the management of atrial fibrillation: the Task Force for the  
57  
58 Management of Atrial Fibrillation of the European Society of Cardiology (ESC), *Eur Heart J*  
59  
60 2010;31:2369-429.
- 6 6 Meyre P, Blum S, Berger S, et al. Risk of hospital admissions in patients with atrial fibrillation: a  
systematic review and meta-analysis, *Can J Cardiol* 2019;35:1332-43.
- 7 7 Lowres N, Olivier J, Chao T, et al. Estimated stroke risk, yield, and number needed to screen for  
atrial fibrillation detected through single time screening: a multicountry patient-level meta-analysis of  
141,220 screened individuals, *PLoS medicine* 2019;16:e1002903.

- 1  
2  
3 8 Ruddox V, Sandven I, Munkhaugen J, et al. Atrial fibrillation and the risk for myocardial infarction,  
4 all-cause mortality and heart failure: a systematic review and meta-analysis, *European journal of*  
5 *preventive cardiology* 2017;24:1555-66.  
6  
7 9 Goodsite ME, Hertel O, Johnson MS, et al. Urban air quality: Sources and concentrations. In:  
8 Anonymous . Air Pollution Sources, Statistics and Health Effects: Springer 2021:193-214.  
9  
10 10 Stafoggia M, Zauli-Sajani S, Pey J, et al. Desert Dust Outbreaks in Southern Europe: Contribution  
11 to Daily PM(1)(0) Concentrations and Short-Term Associations with Mortality and Hospital  
12 Admissions, *Environ Health Perspect* 2016;124:413-9 doi:10.1289/ehp.1409164 [doi] [published  
13 Online First: Apr].  
14  
15 11 Querol X, Pey J, Pandolfi M, et al. African dust contributions to mean ambient PM10 mass-levels  
16 across the Mediterranean Basin, *Atmos Environ* 2009;43:4266-77.  
17  
18 12 Griffin DW. Atmospheric movement of microorganisms in clouds of desert dust and implications  
19 for human health, *Clin Microbiol Rev* 2007;20:459-77.  
20  
21 13 Middleton N, Yiallourous P, Kleanthous S, et al. A 10-year time-series analysis of respiratory and  
22 cardiovascular morbidity in Nicosia, Cyprus: the effect of short-term changes in air pollution and dust  
23 storms, *Environ Health* 2008;7:1-16.  
24  
25 14 Neophytou AM, Yiallourous P, Coull BA, et al. Particulate matter concentrations during desert dust  
26 outbreaks and daily mortality in Nicosia, Cyprus, *Journal of Exposure Science & Environmental*  
27 *Epidemiology* 2013;23:275-80.  
28  
29 15 Domínguez-Rodríguez A, Báez-Ferrer N, Abreu-González P, et al. Impact of Desert Dust Events  
30 on the Cardiovascular Disease: A Systematic Review and Meta-Analysis, *Journal of clinical medicine*  
31 2021;10:727.  
32  
33 16 Al B, Bogan M, Zengin S, et al. Effects of dust storms and climatological factors on mortality and  
34 morbidity of cardiovascular diseases admitted to ED, *Emergency medicine international* 2018;2018.  
35  
36 17 Link MS, Luttmann-Gibson H, Schwartz J, et al. Acute exposure to air pollution triggers atrial  
37 fibrillation, *J Am Coll Cardiol* 2013;62:816-25.  
38  
39 18 Yitshak Sade M, Vodonos A, Novack V, et al. Can air pollution trigger an onset of atrial  
40 fibrillation: a population-based study, *Air Quality, Atmosphere & Health* 2015;8:413-20.  
41  
42 19 Lee HH, Pan SC, Chen BY, et al. Atrial fibrillation hospitalization is associated with exposure to  
43 fine particulate air pollutants, *Environ Health* 2019;18:1-8.  
44  
45 20 Kinni P, Kouis P, Dimitriou H, et al. Health effects of desert dust storm events in the south-eastern  
46 Mediterranean: perceptions and practices of local stakeholders, *East Mediterr Health J* 2021;27:1092-  
47 101 doi:10.26719/emhj.21.037 [doi] [published Online First: Dec 1].  
48  
49 21 Kelly FJ, Fuller GW, Walton HA, et al. Monitoring air pollution: Use of early warning systems for  
50 public health, *Respirology* 2012;17:7-19.  
51  
52 22 Holgate S. Review of the UK Air quality index. A report by the Committee on the medical effects  
53 of air pollutants, *Health Protection Agency, London* 2011.  
54  
55 23 D'Antoni D, Smith L, Auyeung V, et al. Psychosocial and demographic predictors of adherence  
56 and non-adherence to health advice accompanying air quality warning systems: a systematic review,  
57 *Environ Health* 2017;16:1-18.  
58  
59  
60

- 1  
2  
3 24 Chan A, Tetzlaff JM, Gøtzsche PC, et al. SPIRIT 2013 explanation and elaboration: guidance for  
4 protocols of clinical trials, *BMJ* 2013;346.  
5
- 6 25 Kouis P, Papatheodorou SI, Kakkoura MG, et al. The MEDEA childhood asthma study design for  
7 mitigation of desert dust health effects: implementation of novel methods for assessment of air  
8 pollution exposure and lessons learned, *BMC pediatrics* 2021;21:1-9.  
9
- 10 26 Spertus J, Dorian P, Bubien R, et al. Development and validation of the Atrial Fibrillation Effect  
11 on QualiTY-of-Life (AFEQT) Questionnaire in patients with atrial fibrillation, *Circulation:  
12 Arrhythmia and Electrophysiology* 2011;4:15-25.  
13
- 14 27 Min K, Kwon H, Kim K, et al. Air pollution monitoring design for epidemiological application in a  
15 densely populated city, *International journal of environmental research and public health*  
16 2017;14:686.  
17
- 18 28 Baek S, Kim Y, Perry R. Indoor air quality in homes, offices and restaurants in Korean urban  
19 areas—indoor/outdoor relationships, *Atmos Environ* 1997;31:529-44.  
20
- 21 29 Leung DY. Outdoor-indoor air pollution in urban environment: challenges and opportunity,  
22 *Frontiers in Environmental Science* 2015;2:69.  
23
- 24 30 Hoek G. Methods for assessing long-term exposures to outdoor air pollutants, *Current  
25 environmental health reports* 2017;4:450-62.  
26
- 27 31 Wu X, Bennett DH, Lee K, et al. Longitudinal variability of time-location/activity patterns of  
28 population at different ages: a longitudinal study in California, *Environ Health* 2011;10:1-15.  
29
- 30 32 Setton E, Marshall JD, Brauer M, et al. The impact of daily mobility on exposure to traffic-related  
31 air pollution and health effect estimates, *Journal of exposure science & environmental epidemiology*  
32 2011;21:42-8.  
33
- 34 33 Park YM, Kwan M. Individual exposure estimates may be erroneous when spatiotemporal  
35 variability of air pollution and human mobility are ignored, *Health Place* 2017;43:85-94.  
36
- 37 34 Yarza S, Hassan L, Shtein A, et al. Novel Approaches to Air Pollution Exposure and Clinical  
38 Outcomes Assessment in Environmental Health Studies, *Atmosphere* 2020;11:122.  
39
- 40 35 Munos B, Baker PC, Bot BM, et al. Mobile health: the power of wearables, sensors, and apps to  
41 transform clinical trials, *Ann N Y Acad Sci* 2016;1375:3-18.  
42
- 43 36 Reeder B, David A. Health at hand: A systematic review of smart watch uses for health and  
44 wellness, *J Biomed Inform* 2016;63:269-76.  
45
- 46 37 Trifan A, Oliveira M, Oliveira JL. Passive sensing of health outcomes through smartphones:  
47 systematic review of current solutions and possible limitations, *JMIR mHealth and uHealth*  
48 2019;7:e12649.  
49  
50  
51  
52  
53  
54  
55  
56  
57  
58  
59  
60

1  
2  
3  
4  
5  
6  
7  
8  
9  
10 **Figure Legends:**  
11

12  
13 **Figure 1: MEDEA Atrial Fibrillation study SPIRIT flow diagram:** The schedule of enrolment,  
14 allocation, interventions and assessments in the AF panel study according to SPIRIT template.  
15  
16

17  
18  
19  
20 **Figure 2: MEDEA Atrial Fibrillation study schematic diagram.** The bidirectional MEDena®  
21 Health-Hub is updated with meteorological forecasting and air-quality information regarding DDS  
22 events and sends alerts and exposure reduction guidelines to AF patients. At the same time, the cloud  
23 database is automatically collecting the physical activity and GPS data from the smartwatches worn by  
24 the participants. Researchers also manually upload participants' clinical data and air quality  
25 measurements. DDS: Desert Dust Storm, AF: Atrial Fibrillation HRQoL: Health Related Quality of  
26 Life, AFEQT: Atrial Fibrillation Effect on Quality of Life questionnaire, GPS: Global Positioning  
27 System, SMS: Short Messaging Service text message.  
28  
29  
30  
31  
32  
33  
34  
35  
36  
37

38 **Figure 3: MEDEA Atrial Fibrillation study assessments timeline.** Timeline of baseline and follow-  
39 up assessments in Atrial Fibrillation panel study for the two study years. DDS: Desert Dust Storm, AF:  
40 Atrial Fibrillation HRQoL: Health Related Quality of Life, AFEQT: Atrial Fibrillation Effect on  
41 Quality of Life questionnaire, ICD: Implantable Cardioverter Defibrillator.  
42  
43  
44  
45  
46  
47  
48  
49  
50  
51  
52  
53  
54  
55  
56  
57  
58  
59  
60

1  
2  
3  
4  
5  
6  
7  
8  
9  
10  
11  
12  
13  
14  
15  
16  
17  
18  
19  
20  
21  
22  
23  
24  
25  
26  
27  
28  
29  
30  
31  
32  
33  
34  
35  
36  
37  
38  
39  
40  
41  
42  
43  
44  
45  
46  
47  
48  
49  
50  
51  
52  
53  
54  
55  
56  
57  
58  
59  
60

|                                              | STUDY PERIOD - MEDEA Atrial Fibrillation study    |                                                   |                                                   |                                                 |                                                 |                                                        |
|----------------------------------------------|---------------------------------------------------|---------------------------------------------------|---------------------------------------------------|-------------------------------------------------|-------------------------------------------------|--------------------------------------------------------|
|                                              | Enrolment                                         | Allocation                                        | Post-allocation                                   |                                                 |                                                 | Close-out                                              |
| TIMEPOINT                                    |                                                   |                                                   | $t_1$<br>Baseline                                 | $t_2$                                           | $t_x$                                           | $t_{x+1}$<br>End of follow-up                          |
|                                              | Month 0 ( $t_0$ )<br>(1 <sup>st</sup> study year) | Month 0 ( $t_0$ )<br>(1 <sup>st</sup> study year) | Month 1 ( $t_1$ )<br>(1 <sup>st</sup> study year) | Month 2 ( $t_2$ )<br>(1 <sup>st</sup> study yr) | Monthly ( $t_x$ )<br>(1 <sup>st</sup> study yr) | Last month ( $t_{x+1}$ )<br>(1 <sup>st</sup> study yr) |
|                                              | Month 0 ( $t_0$ )<br>(2 <sup>nd</sup> study year) | Month 0 ( $t_0$ )<br>(2 <sup>nd</sup> study year) | Month 1 ( $t_1$ )<br>(2 <sup>nd</sup> study year) | Month 2 ( $t_2$ )<br>(2 <sup>nd</sup> study yr) | Monthly ( $t_x$ )<br>(2 <sup>nd</sup> study yr) | Last month ( $t_{x+1}$ )<br>(2 <sup>nd</sup> study yr) |
|                                              | Month 0 ( $t_0$ )<br>(3 <sup>rd</sup> study year) | Month 0 ( $t_0$ )<br>(3 <sup>rd</sup> study year) | Month 1 ( $t_1$ )<br>(3 <sup>rd</sup> study year) | Month 2 ( $t_2$ )<br>(3 <sup>rd</sup> study yr) | Monthly ( $t_x$ )<br>(3 <sup>rd</sup> study yr) | Last month ( $t_{x+1}$ )<br>(3 <sup>rd</sup> study yr) |
| <b>ENROLMENT:</b>                            |                                                   |                                                   |                                                   |                                                 |                                                 |                                                        |
| Eligibility screen                           | X                                                 |                                                   |                                                   |                                                 |                                                 |                                                        |
| Informed consent                             | X                                                 |                                                   |                                                   |                                                 |                                                 |                                                        |
| Training on MEDEA tools & materials          |                                                   | X                                                 |                                                   |                                                 |                                                 |                                                        |
| Allocation                                   |                                                   | X                                                 |                                                   |                                                 |                                                 |                                                        |
| <b>INTERVENTIONS:</b>                        |                                                   |                                                   |                                                   |                                                 |                                                 |                                                        |
| Control                                      |                                                   |                                                   | ←————→                                            |                                                 |                                                 |                                                        |
| Outdoor Exposure Reduction                   |                                                   |                                                   | ←————→                                            |                                                 |                                                 |                                                        |
| Outdoor & Indoor Exposure Reduction          |                                                   |                                                   | ←————→                                            |                                                 |                                                 |                                                        |
| <b>ASSESSMENTS:</b>                          |                                                   |                                                   |                                                   |                                                 |                                                 |                                                        |
| Pacemaker ICD Recordings                     | X                                                 |                                                   | X                                                 |                                                 |                                                 | X                                                      |
| Monitoring of location and physical activity |                                                   |                                                   | ←————→                                            |                                                 |                                                 |                                                        |
| AFEQT Questionnaire                          |                                                   |                                                   | X                                                 | X                                               | X                                               | X                                                      |
| AF Medication Use                            |                                                   |                                                   | X                                                 | X                                               | X                                               | X                                                      |
| Unscheduled Visits to Clinician              |                                                   |                                                   | X                                                 | X                                               | X                                               | X                                                      |

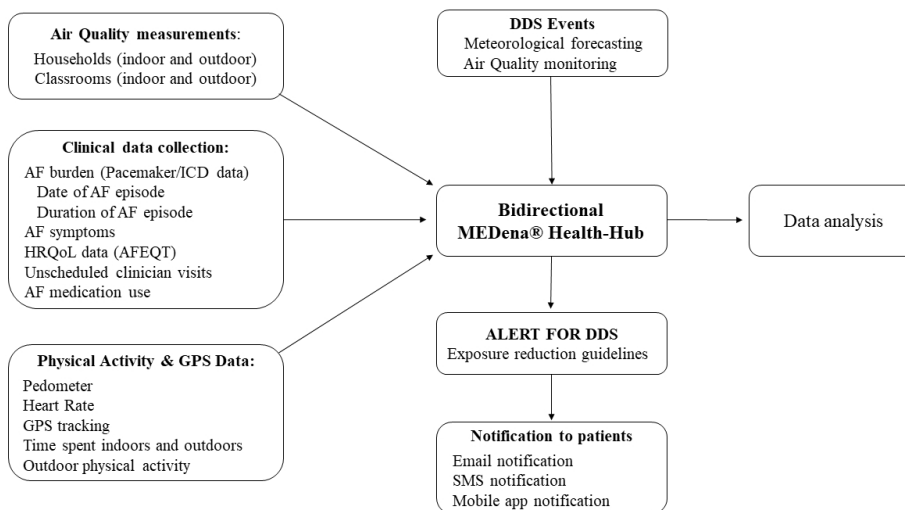

338x190mm (96 x 96 DPI)



1  
2  
3  
4  
5  
6  
7  
8  
9  
10  
11  
12  
13  
14  
15  
16  
17  
18  
19  
20  
21  
22  
23  
24  
25  
26  
27  
28  
29  
30  
31  
32  
33  
34  
35  
36  
37  
38  
39  
40  
41  
42  
43  
44  
45  
46  
47  
48  
49  
50  
51  
52  
53  
54  
55  
56  
57  
58  
59  
60

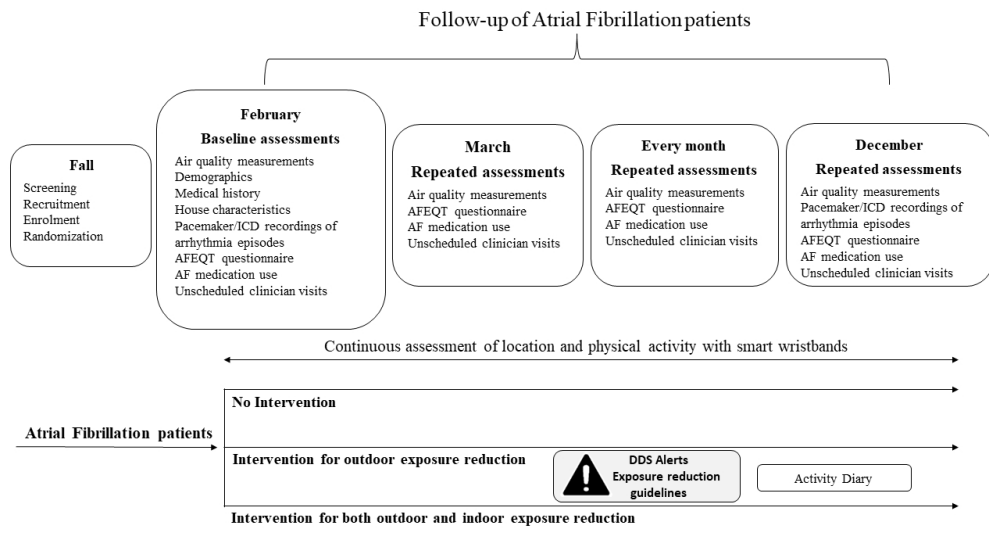

338x190mm (96 x 96 DPI)

## SUPPLEMENTARY MATERIAL

### Methods and analysis

#### *Details of recruiting AF patients*

In order to facilitate recruitment of AF patients, a network of Cardiologists who run large cardiac arrhythmia clinics has been established in collaborating health centers (Nicosia General Hospital, University Hospital of Heraklion and Soroka Research Clinical Center) at each of the three countries. Relations have also been established with the Clinical and Nursing staff of the Clinics and Patients' Associations and the details of the project have been explained to them. Screening of the AF patients at each site started in Summer 2018. The medical/symptom and medication history and downloads from patients' pacemakers or ICDs are obtained and examined in order to assess whether the candidate for enrolment fulfils the eligibility criteria. Patients are able to ask questions for clarification of all aspects of the program. Eligible AF patients are then invited to participate in the MEDEA program after they give written informed consent. An independent researcher provides the sequential number and the assignment group at the baseline clinical visit, who is responsible also for the participants' training on the use of devices after recruitment. Due to the nature of the study, the participants couldn't be blinded to the assignment group.

#### *Details of implementation of the intervention*

When predefined algorithms of PM<sub>10</sub> levels are fulfilled, MEDEA air pollution scientists at each study site, promptly communicate alerts for the appearance of DDS through the e-platform to the participants in the intervention legs of the study, but not to the participants in the control group. To this effect, emails, smartphone applications and text messaging are used to disseminate the specific exposure reduction recommendations in text and animated videos. The participants are familiarised at recruitment with the respective intervention recommendations through animated videos and take home hard-cover flyers printed in a user-friendly layout, to encourage compliance to the intervention.

In participants who are randomized to the combined outdoor and indoor intervention, we also arrange at recruitment to visit their houses within the same week and install air-cleaning devices. Instructions on the use of air cleaners are provided to patients on site. During the home visit, we also assess the placement, and thus functionality of the air cleaner, in a room of the house where the participant spends most of the time (typically between bedroom and sitting room). Reminders are taped on the air cleaners advising to keep them functioning continuously, throughout the six-month study period. Monthly clean-ups of the HEPA filters of the air cleaner are performed by the research staff, as recommended by the manufacturer.

## Study organisation & coordination

### DATA ACCESS, OWNERSHIP OF RESULTS, DATA TRANSFER AND PUBLICATION AGREEMENTS

A consortium agreement signed by all participating centers sets the obligations for data access, ownership of results, data transfer and publication agreements.

### RESPONSIBILITIES AND COMMITTEES

Coordinating center: Apart from the coordination of the study, the coordinating center is responsible for the acquisition of rights for tools usage.

Data management team: The team consists of researchers from the three centers aiming to ensure data collection, data cleaning and the appropriate preparation of the study dataset.

Steering Committee: The Steering Committee scrutinizes the quality of the project performance, acts as a supervisory body to ensure that the work described in individual actions is carried out and is responsible for troubleshooting. The members of the steering committee include the Project Coordinator, Project Manager, and the Leaders of all other project partners (Soroca Clinical Research Center, University of Crete, Cyprus University of Technology, E.n.A. Consulting, Department of Labor Inspection, Cyprus Broadcasting Corporation, Cyprus Department of Meteorology).

External Advisory Committee: The external advisory committee is responsible to counsel the project and to help transform our results to policies. It consists of 33 members from relevant regulatory authorities and interested stakeholders from all participating sites (Cyprus, Greece, Israel).

A data monitoring committee was not needed for this study, because the participants are adults, the behavioural intervention has very low chance of producing harm, and the duration of the follow-up period for each participant is short (6 months).

### PARTICIPANT CONFIDENTIALITY

#### Administrative safeguards:

Data are completely anonymized and encrypted prior to sending to the central database. The full record of AF participants with names, addresses, and other personal information are kept by the principal investigator (PY) at the Medical School of the University of Cyprus and only authorized personnel will have access to this data (LIFE MEDEA+ project scientist PK). All collected data will be analyzed and discussed between program partners only by using codes (a participant identification number (Participant ID, PID) to ensure that the anonymity of the participants is fully preserved and to maintain confidentiality.

#### Technical safeguards:

Electronic access to patient data requires a user name and password that is only held by authorized personnel. All computer entry and networking programs are done using PIDs only. In addition, the Microsoft Azure storage platform used for the purpose of data storage and backup, is Health Insurance

1  
2  
3 Portability and Accountability Act (HIPAA) compliant that establishes requirements for the use,  
4 disclosure, and safeguarding of individually identifiable health information.  
5

6 The University of Cyprus has a policy that requires computer users not to leave computers unattended  
7 and not to exchange entry codes between them. Still, it is worth mentioning that after a few hours of  
8 non-use, the computer automatically turns off and locks again, requiring the use of the input code again.  
9 In the event that a computer containing personal data is no longer used, the University of Cyprus ensures  
10 that the data will either be transferred or destroyed.  
11  
12  
13

#### 14 Physical safeguards:

15  
16 The Medical School of the University of Cyprus is housed at the Shakolas Educational Center, a safe  
17 building on Nicosia-Limassol Old Road, in Aglantzia, Nicosia. The building is protected internally and  
18 with the supervision of the surrounding area, on a daily basis with a 24-hour security guard. The guard  
19 checks all incoming people in the building. Data that may be in print will be kept in a closet in the office  
20 of the Project Coordinator so that no unauthorized person has access to them. All records will be kept  
21 in a locked file cabinet.  
22  
23  
24  
25  
26  
27  
28  
29  
30  
31  
32  
33  
34  
35  
36  
37  
38  
39  
40  
41  
42  
43  
44  
45  
46  
47  
48  
49  
50  
51  
52  
53  
54  
55  
56  
57  
58  
59  
60

# Reporting checklist for protocol of a clinical trial.

Based on the SPIRIT guidelines.

## Instructions to authors

Complete this checklist by entering the page numbers from your manuscript where readers will find each of the items listed below.

Your article may not currently address all the items on the checklist. Please modify your text to include the missing information. If you are certain that an item does not apply, please write "n/a" and provide a short explanation.

Upload your completed checklist as an extra file when you submit to a journal.

In your methods section, say that you used the SPIRIT reporting guidelines, and cite them as:

Chan A-W, Tetzlaff JM, Gøtzsche PC, Altman DG, Mann H, Berlin J, Dickersin K, Hróbjartsson A, Schulz KF, Parulekar WR, Krleža-Jerić K, Laupacis A, Moher D. SPIRIT 2013 Explanation and Elaboration: Guidance for protocols of clinical trials. *BMJ*. 2013;346:e7586

|                                             |                     | Reporting Item                                                                                               | Page Number |
|---------------------------------------------|---------------------|--------------------------------------------------------------------------------------------------------------|-------------|
| <b>Administrative information</b>           |                     |                                                                                                              |             |
| Title                                       | <a href="#">#1</a>  | Descriptive title identifying the study design, population, interventions, and, if applicable, trial acronym | 1           |
| Trial registration                          | <a href="#">#2a</a> | Trial identifier and registry name. If not yet registered, name of intended registry                         | 4           |
| Trial registration: data set                | <a href="#">#2b</a> | All items from the World Health Organization Trial Registration Data Set                                     | N/A         |
| Protocol version                            | <a href="#">#3</a>  | Date and version identifier                                                                                  | N/A         |
| Funding                                     | <a href="#">#4</a>  | Sources and types of financial, material, and other support                                                  | 14          |
| Roles and responsibilities: contributorship | <a href="#">#5a</a> | Names, affiliations, and roles of protocol contributors                                                      | 15          |

|    |                           |                     |                                                        |               |
|----|---------------------------|---------------------|--------------------------------------------------------|---------------|
| 1  | Roles and                 | <a href="#">#5b</a> | Name and contact information for the trial sponsor     | 14            |
| 2  | responsibilities:         |                     |                                                        |               |
| 3  | sponsor contact           |                     |                                                        |               |
| 4  | information               |                     |                                                        |               |
| 5  |                           |                     |                                                        |               |
| 6  |                           |                     |                                                        |               |
| 7  |                           |                     |                                                        |               |
| 8  | Roles and                 | <a href="#">#5c</a> | Role of study sponsor and funders, if any, in study    | 14            |
| 9  | responsibilities:         |                     | design; collection, management, analysis, and          |               |
| 10 | sponsor and funder        |                     | interpretation of data; writing of the report; and the |               |
| 11 |                           |                     | decision to submit the report for publication,         |               |
| 12 |                           |                     | including whether they will have ultimate authority    |               |
| 13 |                           |                     | over any of these activities                           |               |
| 14 |                           |                     |                                                        |               |
| 15 |                           |                     |                                                        |               |
| 16 |                           |                     |                                                        |               |
| 17 | Roles and                 | <a href="#">#5d</a> | Composition, roles, and responsibilities of the        | Supplementary |
| 18 | responsibilities:         |                     | coordinating centre, steering committee, endpoint      | material      |
| 19 | committees                |                     | adjudication committee, data management team,          |               |
| 20 |                           |                     | and other individuals or groups overseeing the         |               |
| 21 |                           |                     | trial, if applicable (see Item 21a for data            |               |
| 22 |                           |                     | monitoring committee)                                  |               |
| 23 |                           |                     |                                                        |               |
| 24 |                           |                     |                                                        |               |
| 25 |                           |                     |                                                        |               |
| 26 |                           |                     |                                                        |               |
| 27 | <b>Introduction</b>       |                     |                                                        |               |
| 28 |                           |                     |                                                        |               |
| 29 |                           |                     |                                                        |               |
| 30 | Background and            | <a href="#">#6a</a> | Description of research question and justification     | 5-6           |
| 31 | rationale                 |                     | for undertaking the trial, including summary of        |               |
| 32 |                           |                     | relevant studies (published and unpublished)           |               |
| 33 |                           |                     | examining benefits and harms for each                  |               |
| 34 |                           |                     | intervention                                           |               |
| 35 |                           |                     |                                                        |               |
| 36 |                           |                     |                                                        |               |
| 37 |                           |                     |                                                        |               |
| 38 | Background and            | <a href="#">#6b</a> | Explanation for choice of comparators                  | 6             |
| 39 | rationale: choice of      |                     |                                                        |               |
| 40 | comparators               |                     |                                                        |               |
| 41 |                           |                     |                                                        |               |
| 42 |                           |                     |                                                        |               |
| 43 | Objectives                | <a href="#">#7</a>  | Specific objectives or hypotheses                      | 6             |
| 44 |                           |                     |                                                        |               |
| 45 |                           |                     |                                                        |               |
| 46 | Trial design              | <a href="#">#8</a>  | Description of trial design including type of trial    | 6             |
| 47 |                           |                     | (eg, parallel group, crossover, factorial, single      |               |
| 48 |                           |                     | group), allocation ratio, and framework (eg,           |               |
| 49 |                           |                     | superiority, equivalence, non-inferiority,             |               |
| 50 |                           |                     | exploratory)                                           |               |
| 51 |                           |                     |                                                        |               |
| 52 |                           |                     |                                                        |               |
| 53 |                           |                     |                                                        |               |
| 54 | <b>Methods:</b>           |                     |                                                        |               |
| 55 | <b>Participants,</b>      |                     |                                                        |               |
| 56 | <b>interventions, and</b> |                     |                                                        |               |
| 57 | <b>outcomes</b>           |                     |                                                        |               |
| 58 |                           |                     |                                                        |               |
| 59 |                           |                     |                                                        |               |
| 60 |                           |                     |                                                        |               |

|    |                      |                      |                                                                                                                                                                                                                                                                                                                                                                                |                 |
|----|----------------------|----------------------|--------------------------------------------------------------------------------------------------------------------------------------------------------------------------------------------------------------------------------------------------------------------------------------------------------------------------------------------------------------------------------|-----------------|
| 1  | Study setting        | <a href="#">#9</a>   | Description of study settings (eg, community clinic, academic hospital) and list of countries where data will be collected. Reference to where list of study sites can be obtained                                                                                                                                                                                             | 6               |
| 2  |                      |                      |                                                                                                                                                                                                                                                                                                                                                                                |                 |
| 3  |                      |                      |                                                                                                                                                                                                                                                                                                                                                                                |                 |
| 4  |                      |                      |                                                                                                                                                                                                                                                                                                                                                                                |                 |
| 5  |                      |                      |                                                                                                                                                                                                                                                                                                                                                                                |                 |
| 6  |                      |                      |                                                                                                                                                                                                                                                                                                                                                                                |                 |
| 7  |                      |                      |                                                                                                                                                                                                                                                                                                                                                                                |                 |
| 8  | Eligibility criteria | <a href="#">#10</a>  | Inclusion and exclusion criteria for participants. If applicable, eligibility criteria for study centres and individuals who will perform the interventions (eg, surgeons, psychotherapists)                                                                                                                                                                                   | 7               |
| 9  |                      |                      |                                                                                                                                                                                                                                                                                                                                                                                |                 |
| 10 |                      |                      |                                                                                                                                                                                                                                                                                                                                                                                |                 |
| 11 |                      |                      |                                                                                                                                                                                                                                                                                                                                                                                |                 |
| 12 |                      |                      |                                                                                                                                                                                                                                                                                                                                                                                |                 |
| 13 |                      |                      |                                                                                                                                                                                                                                                                                                                                                                                |                 |
| 14 | Interventions:       | <a href="#">#11a</a> | Interventions for each group with sufficient detail to allow replication, including how and when they will be administered                                                                                                                                                                                                                                                     | 7               |
| 15 | description          |                      |                                                                                                                                                                                                                                                                                                                                                                                |                 |
| 16 |                      |                      |                                                                                                                                                                                                                                                                                                                                                                                |                 |
| 17 |                      |                      |                                                                                                                                                                                                                                                                                                                                                                                |                 |
| 18 |                      |                      |                                                                                                                                                                                                                                                                                                                                                                                |                 |
| 19 |                      |                      |                                                                                                                                                                                                                                                                                                                                                                                |                 |
| 20 | Interventions:       | <a href="#">#11b</a> | Criteria for discontinuing or modifying allocated interventions for a given trial participant (eg, drug dose change in response to harms, participant request, or improving / worsening disease)                                                                                                                                                                               | 10              |
| 21 | modifications        |                      |                                                                                                                                                                                                                                                                                                                                                                                |                 |
| 22 |                      |                      |                                                                                                                                                                                                                                                                                                                                                                                |                 |
| 23 |                      |                      |                                                                                                                                                                                                                                                                                                                                                                                |                 |
| 24 |                      |                      |                                                                                                                                                                                                                                                                                                                                                                                |                 |
| 25 |                      |                      |                                                                                                                                                                                                                                                                                                                                                                                |                 |
| 26 |                      |                      |                                                                                                                                                                                                                                                                                                                                                                                |                 |
| 27 | Interventions:       | <a href="#">#11c</a> | Strategies to improve adherence to intervention protocols, and any procedures for monitoring adherence (eg, drug tablet return; laboratory tests)                                                                                                                                                                                                                              | 8, 9            |
| 28 | adherence            |                      |                                                                                                                                                                                                                                                                                                                                                                                |                 |
| 29 |                      |                      |                                                                                                                                                                                                                                                                                                                                                                                |                 |
| 30 |                      |                      |                                                                                                                                                                                                                                                                                                                                                                                |                 |
| 31 |                      |                      |                                                                                                                                                                                                                                                                                                                                                                                |                 |
| 32 |                      |                      |                                                                                                                                                                                                                                                                                                                                                                                |                 |
| 33 |                      |                      |                                                                                                                                                                                                                                                                                                                                                                                |                 |
| 34 | Interventions:       | <a href="#">#11d</a> | Relevant concomitant care and interventions that are permitted or prohibited during the trial                                                                                                                                                                                                                                                                                  | 7               |
| 35 | concomitant care     |                      |                                                                                                                                                                                                                                                                                                                                                                                |                 |
| 36 |                      |                      |                                                                                                                                                                                                                                                                                                                                                                                |                 |
| 37 |                      |                      |                                                                                                                                                                                                                                                                                                                                                                                |                 |
| 38 | Outcomes             | <a href="#">#12</a>  | Primary, secondary, and other outcomes, including the specific measurement variable (eg, systolic blood pressure), analysis metric (eg, change from baseline, final value, time to event), method of aggregation (eg, median, proportion), and time point for each outcome. Explanation of the clinical relevance of chosen efficacy and harm outcomes is strongly recommended | 10              |
| 39 |                      |                      |                                                                                                                                                                                                                                                                                                                                                                                |                 |
| 40 |                      |                      |                                                                                                                                                                                                                                                                                                                                                                                |                 |
| 41 |                      |                      |                                                                                                                                                                                                                                                                                                                                                                                |                 |
| 42 |                      |                      |                                                                                                                                                                                                                                                                                                                                                                                |                 |
| 43 |                      |                      |                                                                                                                                                                                                                                                                                                                                                                                |                 |
| 44 |                      |                      |                                                                                                                                                                                                                                                                                                                                                                                |                 |
| 45 |                      |                      |                                                                                                                                                                                                                                                                                                                                                                                |                 |
| 46 |                      |                      |                                                                                                                                                                                                                                                                                                                                                                                |                 |
| 47 |                      |                      |                                                                                                                                                                                                                                                                                                                                                                                |                 |
| 48 |                      |                      |                                                                                                                                                                                                                                                                                                                                                                                |                 |
| 49 |                      |                      |                                                                                                                                                                                                                                                                                                                                                                                |                 |
| 50 | Participant timeline | <a href="#">#13</a>  | Time schedule of enrolment, interventions (including any run-ins and washouts), assessments, and visits for participants. A schematic diagram is highly recommended (see Figure)                                                                                                                                                                                               | 9-10 & Figure 3 |
| 51 |                      |                      |                                                                                                                                                                                                                                                                                                                                                                                |                 |
| 52 |                      |                      |                                                                                                                                                                                                                                                                                                                                                                                |                 |
| 53 |                      |                      |                                                                                                                                                                                                                                                                                                                                                                                |                 |
| 54 |                      |                      |                                                                                                                                                                                                                                                                                                                                                                                |                 |
| 55 |                      |                      |                                                                                                                                                                                                                                                                                                                                                                                |                 |
| 56 |                      |                      |                                                                                                                                                                                                                                                                                                                                                                                |                 |
| 57 |                      |                      |                                                                                                                                                                                                                                                                                                                                                                                |                 |
| 58 |                      |                      |                                                                                                                                                                                                                                                                                                                                                                                |                 |
| 59 |                      |                      |                                                                                                                                                                                                                                                                                                                                                                                |                 |
| 60 |                      |                      |                                                                                                                                                                                                                                                                                                                                                                                |                 |

|    |                           |                      |                                                        |               |
|----|---------------------------|----------------------|--------------------------------------------------------|---------------|
| 1  | Sample size               | <a href="#">#14</a>  | Estimated number of participants needed to             | 10            |
| 2  |                           |                      | achieve study objectives and how it was                |               |
| 3  |                           |                      | determined, including clinical and statistical         |               |
| 4  |                           |                      | assumptions supporting any sample size                 |               |
| 5  |                           |                      | calculations                                           |               |
| 6  |                           |                      |                                                        |               |
| 7  |                           |                      |                                                        |               |
| 8  |                           |                      |                                                        |               |
| 9  | Recruitment               | <a href="#">#15</a>  | Strategies for achieving adequate participant          | 6 &           |
| 10 |                           |                      | enrolment to reach target sample size                  | supplementary |
| 11 |                           |                      |                                                        | material      |
| 12 |                           |                      |                                                        |               |
| 13 |                           |                      |                                                        |               |
| 14 | <b>Methods:</b>           |                      |                                                        |               |
| 15 | <b>Assignment of</b>      |                      |                                                        |               |
| 16 | <b>interventions (for</b> |                      |                                                        |               |
| 17 | <b>controlled trials)</b> |                      |                                                        |               |
| 18 |                           |                      |                                                        |               |
| 19 |                           |                      |                                                        |               |
| 20 |                           |                      |                                                        |               |
| 21 | Allocation: sequence      | <a href="#">#16a</a> | Method of generating the allocation sequence (eg,      | 7             |
| 22 | generation                |                      | computer-generated random numbers), and list of        |               |
| 23 |                           |                      | any factors for stratification. To reduce              |               |
| 24 |                           |                      | predictability of a random sequence, details of any    |               |
| 25 |                           |                      | planned restriction (eg, blocking) should be           |               |
| 26 |                           |                      | provided in a separate document that is                |               |
| 27 |                           |                      | unavailable to those who enrol participants or         |               |
| 28 |                           |                      | assign interventions                                   |               |
| 29 |                           |                      |                                                        |               |
| 30 |                           |                      |                                                        |               |
| 31 |                           |                      |                                                        |               |
| 32 |                           |                      |                                                        |               |
| 33 |                           |                      |                                                        |               |
| 34 | Allocation                | <a href="#">#16b</a> | Mechanism of implementing the allocation               | Supplementary |
| 35 | concealment               |                      | sequence (eg, central telephone; sequentially          | material      |
| 36 | mechanism                 |                      | numbered, opaque, sealed envelopes), describing        |               |
| 37 |                           |                      | any steps to conceal the sequence until                |               |
| 38 |                           |                      | interventions are assigned                             |               |
| 39 |                           |                      |                                                        |               |
| 40 |                           |                      |                                                        |               |
| 41 |                           |                      |                                                        |               |
| 42 | Allocation:               | <a href="#">#16c</a> | Who will generate the allocation sequence, who         | Supplementary |
| 43 | implementation            |                      | will enrol participants, and who will assign           | material      |
| 44 |                           |                      | participants to interventions                          |               |
| 45 |                           |                      |                                                        |               |
| 46 |                           |                      |                                                        |               |
| 47 |                           |                      |                                                        |               |
| 48 | Blinding (masking)        | <a href="#">#17a</a> | Who will be blinded after assignment to                | Supplementary |
| 49 |                           |                      | interventions (eg, trial participants, care providers, | material      |
| 50 |                           |                      | outcome assessors, data analysts), and how             |               |
| 51 |                           |                      |                                                        |               |
| 52 |                           |                      |                                                        |               |
| 53 | Blinding (masking):       | <a href="#">#17b</a> | If blinded, circumstances under which unblinding       | N/A           |
| 54 | emergency                 |                      | is permissible, and procedure for revealing a          |               |
| 55 | unblinding                |                      | participant's allocated intervention during the trial  |               |
| 56 |                           |                      |                                                        |               |
| 57 |                           |                      |                                                        |               |
| 58 |                           |                      |                                                        |               |
| 59 |                           |                      |                                                        |               |
| 60 |                           |                      |                                                        |               |



1 **Methods: Data**  
 2 **collection,**  
 3 **management, and**  
 4 **analysis**

|    |                                                  |                      |                                                                                                                                                                                                                                                                                                                                                                                                                                                                 |
|----|--------------------------------------------------|----------------------|-----------------------------------------------------------------------------------------------------------------------------------------------------------------------------------------------------------------------------------------------------------------------------------------------------------------------------------------------------------------------------------------------------------------------------------------------------------------|
| 5  |                                                  |                      |                                                                                                                                                                                                                                                                                                                                                                                                                                                                 |
| 6  |                                                  |                      |                                                                                                                                                                                                                                                                                                                                                                                                                                                                 |
| 7  |                                                  |                      |                                                                                                                                                                                                                                                                                                                                                                                                                                                                 |
| 8  | Data collection plan                             | <a href="#">#18a</a> | Plans for assessment and collection of outcome, 8-9<br>9 baseline, and other trial data, including any<br>10 related processes to promote data quality (eg,<br>11 duplicate measurements, training of assessors)<br>12 and a description of study instruments (eg,<br>13 questionnaires, laboratory tests) along with their<br>14 reliability and validity, if known. Reference to<br>15 where data collection forms can be found, if not in<br>16 the protocol |
| 17 |                                                  |                      |                                                                                                                                                                                                                                                                                                                                                                                                                                                                 |
| 18 | Data collection plan: retention                  | <a href="#">#18b</a> | Plans to promote participant retention and N/A<br>23 complete follow-up, including list of any outcome<br>24 data to be collected for participants who<br>25 discontinue or deviate from intervention protocols                                                                                                                                                                                                                                                 |
| 26 |                                                  |                      |                                                                                                                                                                                                                                                                                                                                                                                                                                                                 |
| 27 |                                                  |                      |                                                                                                                                                                                                                                                                                                                                                                                                                                                                 |
| 28 |                                                  |                      |                                                                                                                                                                                                                                                                                                                                                                                                                                                                 |
| 29 | Data management                                  | <a href="#">#19</a>  | Plans for data entry, coding, security, and storage, 8 &<br>30 including any related processes to promote data<br>31 quality (eg, double data entry; range checks for<br>32 data values). Reference to where details of data<br>33 management procedures can be found, if not in<br>34 the protocol<br>35<br>36<br>37<br>38<br>39<br>40<br>41<br>42<br>43<br>44<br>45<br>46<br>47<br>48<br>49<br>50<br>51<br>52<br>53<br>54<br>55<br>56<br>57<br>58<br>59<br>60 |
| 38 | Statistics: outcomes                             | <a href="#">#20a</a> | Statistical methods for analysing primary and 10<br>39 secondary outcomes. Reference to where other<br>40 details of the statistical analysis plan can be<br>41 found, if not in the protocol                                                                                                                                                                                                                                                                   |
| 42 |                                                  |                      |                                                                                                                                                                                                                                                                                                                                                                                                                                                                 |
| 43 | Statistics: additional analyses                  | <a href="#">#20b</a> | Methods for any additional analyses (eg, N/A<br>46 subgroup and adjusted analyses)                                                                                                                                                                                                                                                                                                                                                                              |
| 47 |                                                  |                      |                                                                                                                                                                                                                                                                                                                                                                                                                                                                 |
| 48 |                                                  |                      |                                                                                                                                                                                                                                                                                                                                                                                                                                                                 |
| 49 | Statistics: analysis population and missing data | <a href="#">#20c</a> | Definition of analysis population relating to N/A<br>50 protocol non-adherence (eg, as randomised<br>51 analysis), and any statistical methods to handle<br>52 missing data (eg, multiple imputation)                                                                                                                                                                                                                                                           |
| 53 |                                                  |                      |                                                                                                                                                                                                                                                                                                                                                                                                                                                                 |
| 54 |                                                  |                      |                                                                                                                                                                                                                                                                                                                                                                                                                                                                 |
| 55 |                                                  |                      |                                                                                                                                                                                                                                                                                                                                                                                                                                                                 |
| 56 | <b>Methods:</b>                                  |                      |                                                                                                                                                                                                                                                                                                                                                                                                                                                                 |
| 57 | <b>Monitoring</b>                                |                      |                                                                                                                                                                                                                                                                                                                                                                                                                                                                 |
| 58 |                                                  |                      |                                                                                                                                                                                                                                                                                                                                                                                                                                                                 |
| 59 |                                                  |                      |                                                                                                                                                                                                                                                                                                                                                                                                                                                                 |
| 60 |                                                  |                      |                                                                                                                                                                                                                                                                                                                                                                                                                                                                 |

|                                                       |                                         |                      |                                                                                                                                                                                                                                                                                                                                                         |                           |
|-------------------------------------------------------|-----------------------------------------|----------------------|---------------------------------------------------------------------------------------------------------------------------------------------------------------------------------------------------------------------------------------------------------------------------------------------------------------------------------------------------------|---------------------------|
| 1<br>2<br>3<br>4<br>5<br>6<br>7<br>8<br>9<br>10<br>11 | Data monitoring:<br>formal committee    | <a href="#">#21a</a> | Composition of data monitoring committee (DMC);<br>summary of its role and reporting structure;<br>statement of whether it is independent from the<br>sponsor and competing interests; and reference to<br>where further details about its charter can be<br>found, if not in the protocol. Alternatively, an<br>explanation of why a DMC is not needed | Supplementary<br>material |
| 12<br>13<br>14<br>15<br>16<br>17<br>18                | Data monitoring:<br>interim analysis    | <a href="#">#21b</a> | Description of any interim analyses and stopping<br>guidelines, including who will have access to<br>these interim results and make the final decision<br>to terminate the trial                                                                                                                                                                        | N/A                       |
| 19<br>20<br>21<br>22<br>23<br>24<br>25                | Harms                                   | <a href="#">#22</a>  | Plans for collecting, assessing, reporting, and<br>managing solicited and spontaneously reported<br>adverse events and other unintended effects of<br>trial interventions or trial conduct                                                                                                                                                              | N/A                       |
| 26<br>27<br>28<br>29<br>30                            | Auditing                                | <a href="#">#23</a>  | Frequency and procedures for auditing trial<br>conduct, if any, and whether the process will be<br>independent from investigators and the sponsor                                                                                                                                                                                                       | N/A                       |
| 31<br>32<br>33<br>34                                  | <b>Ethics and<br/>dissemination</b>     |                      |                                                                                                                                                                                                                                                                                                                                                         |                           |
| 35<br>36<br>37<br>38                                  | Research ethics<br>approval             | <a href="#">#24</a>  | Plans for seeking research ethics committee /<br>institutional review board (REC / IRB) approval                                                                                                                                                                                                                                                        | 10-11                     |
| 39<br>40<br>41<br>42<br>43<br>44<br>45<br>46          | Protocol<br>amendments                  | <a href="#">#25</a>  | Plans for communicating important protocol<br>modifications (eg, changes to eligibility criteria,<br>outcomes, analyses) to relevant parties (eg,<br>investigators, REC / IRBs, trial participants, trial<br>registries, journals, regulators)                                                                                                          | N/A                       |
| 47<br>48<br>49<br>50<br>51                            | Consent or assent                       | <a href="#">#26a</a> | Who will obtain informed consent or assent from<br>potential trial participants or authorised<br>surrogates, and how (see Item 32)                                                                                                                                                                                                                      | 11                        |
| 52<br>53<br>54<br>55<br>56<br>57<br>58<br>59<br>60    | Consent or assent:<br>ancillary studies | <a href="#">#26b</a> | Additional consent provisions for collection and<br>use of participant data and biological specimens<br>in ancillary studies, if applicable                                                                                                                                                                                                             | N/A                       |

|    |                                             |                      |                                                                                                                                                                                                                                                                                     |                        |
|----|---------------------------------------------|----------------------|-------------------------------------------------------------------------------------------------------------------------------------------------------------------------------------------------------------------------------------------------------------------------------------|------------------------|
| 1  | Confidentiality                             | <a href="#">#27</a>  | How personal information about potential and enrolled participants will be collected, shared, and maintained in order to protect confidentiality before, during, and after the trial                                                                                                | Supplementary material |
| 2  |                                             |                      |                                                                                                                                                                                                                                                                                     |                        |
| 3  |                                             |                      |                                                                                                                                                                                                                                                                                     |                        |
| 4  |                                             |                      |                                                                                                                                                                                                                                                                                     |                        |
| 5  |                                             |                      |                                                                                                                                                                                                                                                                                     |                        |
| 6  |                                             |                      |                                                                                                                                                                                                                                                                                     |                        |
| 7  |                                             |                      |                                                                                                                                                                                                                                                                                     |                        |
| 8  | Declaration of interests                    | <a href="#">#28</a>  | Financial and other competing interests for principal investigators for the overall trial and each study site                                                                                                                                                                       | 14                     |
| 9  |                                             |                      |                                                                                                                                                                                                                                                                                     |                        |
| 10 |                                             |                      |                                                                                                                                                                                                                                                                                     |                        |
| 11 |                                             |                      |                                                                                                                                                                                                                                                                                     |                        |
| 12 |                                             |                      |                                                                                                                                                                                                                                                                                     |                        |
| 13 | Data access                                 | <a href="#">#29</a>  | Statement of who will have access to the final trial dataset, and disclosure of contractual agreements that limit such access for investigators                                                                                                                                     | Supplementary material |
| 14 |                                             |                      |                                                                                                                                                                                                                                                                                     |                        |
| 15 |                                             |                      |                                                                                                                                                                                                                                                                                     |                        |
| 16 |                                             |                      |                                                                                                                                                                                                                                                                                     |                        |
| 17 |                                             |                      |                                                                                                                                                                                                                                                                                     |                        |
| 18 | Ancillary and post trial care               | <a href="#">#30</a>  | Provisions, if any, for ancillary and post-trial care, and for compensation to those who suffer harm from trial participation                                                                                                                                                       | N/A                    |
| 19 |                                             |                      |                                                                                                                                                                                                                                                                                     |                        |
| 20 |                                             |                      |                                                                                                                                                                                                                                                                                     |                        |
| 21 |                                             |                      |                                                                                                                                                                                                                                                                                     |                        |
| 22 |                                             |                      |                                                                                                                                                                                                                                                                                     |                        |
| 23 |                                             |                      |                                                                                                                                                                                                                                                                                     |                        |
| 24 | Dissemination policy: trial results         | <a href="#">#31a</a> | Plans for investigators and sponsor to communicate trial results to participants, healthcare professionals, the public, and other relevant groups (eg, via publication, reporting in results databases, or other data sharing arrangements), including any publication restrictions | 11                     |
| 25 |                                             |                      |                                                                                                                                                                                                                                                                                     |                        |
| 26 |                                             |                      |                                                                                                                                                                                                                                                                                     |                        |
| 27 |                                             |                      |                                                                                                                                                                                                                                                                                     |                        |
| 28 |                                             |                      |                                                                                                                                                                                                                                                                                     |                        |
| 29 |                                             |                      |                                                                                                                                                                                                                                                                                     |                        |
| 30 |                                             |                      |                                                                                                                                                                                                                                                                                     |                        |
| 31 |                                             |                      |                                                                                                                                                                                                                                                                                     |                        |
| 32 |                                             |                      |                                                                                                                                                                                                                                                                                     |                        |
| 33 |                                             |                      |                                                                                                                                                                                                                                                                                     |                        |
| 34 |                                             |                      |                                                                                                                                                                                                                                                                                     |                        |
| 35 | Dissemination policy: authorship            | <a href="#">#31b</a> | Authorship eligibility guidelines and any intended use of professional writers                                                                                                                                                                                                      | 11                     |
| 36 |                                             |                      |                                                                                                                                                                                                                                                                                     |                        |
| 37 |                                             |                      |                                                                                                                                                                                                                                                                                     |                        |
| 38 |                                             |                      |                                                                                                                                                                                                                                                                                     |                        |
| 39 | Dissemination policy: reproducible research | <a href="#">#31c</a> | Plans, if any, for granting public access to the full protocol, participant-level dataset, and statistical code                                                                                                                                                                     | 12                     |
| 40 |                                             |                      |                                                                                                                                                                                                                                                                                     |                        |
| 41 |                                             |                      |                                                                                                                                                                                                                                                                                     |                        |
| 42 |                                             |                      |                                                                                                                                                                                                                                                                                     |                        |
| 43 |                                             |                      |                                                                                                                                                                                                                                                                                     |                        |
| 44 |                                             |                      |                                                                                                                                                                                                                                                                                     |                        |
| 45 |                                             |                      |                                                                                                                                                                                                                                                                                     |                        |
| 46 | <b>Appendices</b>                           |                      |                                                                                                                                                                                                                                                                                     |                        |
| 47 |                                             |                      |                                                                                                                                                                                                                                                                                     |                        |
| 48 |                                             |                      |                                                                                                                                                                                                                                                                                     |                        |
| 49 | Informed consent materials                  | <a href="#">#32</a>  | Model consent form and other related documentation given to participants and authorised surrogates                                                                                                                                                                                  | Supplementary material |
| 50 |                                             |                      |                                                                                                                                                                                                                                                                                     |                        |
| 51 |                                             |                      |                                                                                                                                                                                                                                                                                     |                        |
| 52 |                                             |                      |                                                                                                                                                                                                                                                                                     |                        |
| 53 |                                             |                      |                                                                                                                                                                                                                                                                                     |                        |
| 54 | Biological specimens                        | <a href="#">#33</a>  | Plans for collection, laboratory evaluation, and storage of biological specimens for genetic or molecular analysis in the current trial and for future use in ancillary studies, if applicable                                                                                      | N/A                    |
| 55 |                                             |                      |                                                                                                                                                                                                                                                                                     |                        |
| 56 |                                             |                      |                                                                                                                                                                                                                                                                                     |                        |
| 57 |                                             |                      |                                                                                                                                                                                                                                                                                     |                        |
| 58 |                                             |                      |                                                                                                                                                                                                                                                                                     |                        |
| 59 |                                             |                      |                                                                                                                                                                                                                                                                                     |                        |
| 60 |                                             |                      |                                                                                                                                                                                                                                                                                     |                        |

1 None The SPIRIT Explanation and Elaboration paper is distributed under the terms of the Creative  
2 Commons Attribution License CC-BY-NC. This checklist can be completed online using  
3 <https://www.goodreports.org/>, a tool made by the [EQUATOR Network](#) in collaboration with  
4 [Penelope.ai](#)  
5  
6  
7  
8  
9  
10  
11  
12  
13  
14  
15  
16  
17  
18  
19  
20  
21  
22  
23  
24  
25  
26  
27  
28  
29  
30  
31  
32  
33  
34  
35  
36  
37  
38  
39  
40  
41  
42  
43  
44  
45  
46  
47  
48  
49  
50  
51  
52  
53  
54  
55  
56  
57  
58  
59  
60

For peer review only

# BMJ Open

## The MEDEA randomized intervention study protocol in Cyprus, Greece and Israel for mitigation of desert dust health effects in adults with atrial fibrillation

|                                                                                                                                                                                                     |                                                                                                                                                                                                                                                                                                                                                                                                                                                                                                                                                                                                                                                                                                                                                                                                                                                                                                                                                                                                                                                                                                                                                                                 |
|-----------------------------------------------------------------------------------------------------------------------------------------------------------------------------------------------------|---------------------------------------------------------------------------------------------------------------------------------------------------------------------------------------------------------------------------------------------------------------------------------------------------------------------------------------------------------------------------------------------------------------------------------------------------------------------------------------------------------------------------------------------------------------------------------------------------------------------------------------------------------------------------------------------------------------------------------------------------------------------------------------------------------------------------------------------------------------------------------------------------------------------------------------------------------------------------------------------------------------------------------------------------------------------------------------------------------------------------------------------------------------------------------|
| Journal:                                                                                                                                                                                            | <i>BMJ Open</i>                                                                                                                                                                                                                                                                                                                                                                                                                                                                                                                                                                                                                                                                                                                                                                                                                                                                                                                                                                                                                                                                                                                                                                 |
| Manuscript ID                                                                                                                                                                                       | bmjopen-2022-069809.R1                                                                                                                                                                                                                                                                                                                                                                                                                                                                                                                                                                                                                                                                                                                                                                                                                                                                                                                                                                                                                                                                                                                                                          |
| Article Type:                                                                                                                                                                                       | Protocol                                                                                                                                                                                                                                                                                                                                                                                                                                                                                                                                                                                                                                                                                                                                                                                                                                                                                                                                                                                                                                                                                                                                                                        |
| Date Submitted by the Author:                                                                                                                                                                       | 22-Feb-2023                                                                                                                                                                                                                                                                                                                                                                                                                                                                                                                                                                                                                                                                                                                                                                                                                                                                                                                                                                                                                                                                                                                                                                     |
| Complete List of Authors:                                                                                                                                                                           | Anagnostopoulou, Pinelopi; University of Cyprus<br>Kouis, Panayiotis; University of Cyprus<br>Papatheodorou, Stefania ; Harvard TH Chan School of Public Health<br>Middleton, Nicos; Cyprus University of Technology, Department of Nursing<br>Papasavvas, Ilias; Nicosia General Hospital, Department of Cardiology<br>Avraamides, Panayiotis; Nicosia General Hospital, Department of Cardiology<br>Simantirakis, Emmanuel; University Hospital of Heraklion, Cardiology Department, Heraklion, Crete, Greece<br>Anastasiou, Ioannis; University Hospital of Heraklion, Cardiology Department, Heraklion, Crete, Greece<br>Novack, Victor; Clalit Health Services<br>Stamatelatos, Gerasimos; E.n.A Consulting LP, Arachova Boeotia, Greece<br>Revas, Efstathios; E.n.A Consulting LP, Arachova Boeotia, Greece<br>Kaniklides, Christos; Cyprus Broadcasting Corporation<br>Tymvios, Filippos; Rural Development and Environment, Department of Meteorology<br>Savvides, Chrysanthos; Ministry of Labour and Social Insurance, Department of Labour Inspection<br>Koutrakis, Petros; Harvard TH Chan School of Public Health<br>Yiallourous, Panayiotis; University of Cyprus |
| <b>Primary Subject Heading</b>:                                                                                                                                                                     | Occupational and environmental medicine                                                                                                                                                                                                                                                                                                                                                                                                                                                                                                                                                                                                                                                                                                                                                                                                                                                                                                                                                                                                                                                                                                                                         |
| Secondary Subject Heading:                                                                                                                                                                          | Cardiovascular medicine, Public health, Health policy                                                                                                                                                                                                                                                                                                                                                                                                                                                                                                                                                                                                                                                                                                                                                                                                                                                                                                                                                                                                                                                                                                                           |
| Keywords:                                                                                                                                                                                           | Pacing & electrophysiology < CARDIOLOGY, PUBLIC HEALTH, Protocols & guidelines < HEALTH SERVICES ADMINISTRATION & MANAGEMENT, Health policy < HEALTH SERVICES ADMINISTRATION & MANAGEMENT, Clinical Trial                                                                                                                                                                                                                                                                                                                                                                                                                                                                                                                                                                                                                                                                                                                                                                                                                                                                                                                                                                       |
| <p>Note: The following files were submitted by the author for peer review, but cannot be converted to PDF. You must view these files (e.g. movies) online.</p> <p>Video S1.mov<br/>Video S2.mov</p> |                                                                                                                                                                                                                                                                                                                                                                                                                                                                                                                                                                                                                                                                                                                                                                                                                                                                                                                                                                                                                                                                                                                                                                                 |

1  
2  
3  
4  
5  
6  
7  
8  
9  
10  
11  
12  
13  
14  
15  
16  
17  
18  
19  
20  
21  
22  
23  
24  
25  
26  
27  
28  
29  
30  
31  
32  
33  
34  
35  
36  
37  
38  
39  
40  
41  
42  
43  
44  
45  
46  
47  
48  
49  
50  
51  
52  
53  
54  
55  
56  
57  
58  
59  
60

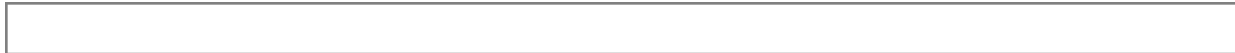

SCHOLARONE™  
Manuscripts

**Title: The MEDEA randomized intervention study protocol in Cyprus, Greece and Israel for mitigation of desert dust health effects in adults with atrial fibrillation**

**List of Authors:**

Pinelopi Anagnostopoulou MD, PhD<sup>1</sup> ([anagnostopoulou.pinelopi@ucy.ac.cy](mailto:anagnostopoulou.pinelopi@ucy.ac.cy))

Panayiotis Kouis PhD<sup>1</sup> ([kouis.panayiotis@ucy.ac.cy](mailto:kouis.panayiotis@ucy.ac.cy))

Stefania Papatheodorou MD, PhD<sup>2</sup> ([spapathe@hsph.harvard.edu](mailto:spapathe@hsph.harvard.edu))

Nicos Middleton PhD<sup>3</sup> ([nicos.middleton@cut.ac.cy](mailto:nicos.middleton@cut.ac.cy))

Ilias Papasavvas MD<sup>4</sup> ([ilipapa@icloud.com](mailto:ilipapa@icloud.com))

Panayiotis Avraamides MD<sup>4</sup> ([pavraamides@mphs.moh.gov.cy](mailto:pavraamides@mphs.moh.gov.cy))

Emmanuel Simantirakis MD, PhD<sup>5</sup> ([esimant@med.uoc.gr](mailto:esimant@med.uoc.gr))

Ioannis Anastasiou MD, PhD<sup>5</sup> ([ioannisaanastassiou@yahoo.gr](mailto:ioannisaanastassiou@yahoo.gr))

Victor Novack MD, PhD<sup>6</sup> ([victorno@clalit.org.il](mailto:victorno@clalit.org.il))

Gerasimos Stamatelatos MSc<sup>7</sup> ([makis.stamatelatos@enaconsulting.gr](mailto:makis.stamatelatos@enaconsulting.gr))

Efstathios Revvas MSc<sup>7</sup> ([stathis.revvas@enaconsulting.gr](mailto:stathis.revvas@enaconsulting.gr))

Christos Kaniklides BSc<sup>8</sup> ([christos.kaniklidis@cybc.com.cy](mailto:christos.kaniklidis@cybc.com.cy))

Filippos Tymvios PhD<sup>9</sup> ([filippos@me.com](mailto:filippos@me.com))

Chrysanthos Savvides PhD<sup>10</sup> ([csavvides@dli.mlsi.gov.cy](mailto:csavvides@dli.mlsi.gov.cy))

Petros Koutrakis PhD<sup>11</sup> ([petros@hsph.harvard.edu](mailto:petros@hsph.harvard.edu))

Panayiotis Yiallourous MD, PhD<sup>1</sup> ([yiallourous.panayiotis@ucy.ac.cy](mailto:yiallourous.panayiotis@ucy.ac.cy))

**Affiliations:** <sup>1</sup>Medical School, University of Cyprus, Nicosia, Cyprus

<sup>2</sup>Department of Epidemiology, Harvard T.H. Chan School of Public Health, Harvard University, Boston, MA, USA.

<sup>3</sup>Department of Nursing, Cyprus University of Technology, Limassol, Cyprus

<sup>4</sup>Department of Cardiology, Nicosia General Hospital, Nicosia, Cyprus

<sup>5</sup>University Hospital of Heraklion, Cardiology Department, Heraklion, Crete, Greece

<sup>6</sup>Soroka University Medical Center (SUMC), Clalit Health Services, Israel

- 1  
2  
3 1 <sup>7</sup>E.n.A Consulting LP, Arachova Boeotia, Greece  
4  
5 2 <sup>8</sup>Cyprus Broadcasting Corporation, Nicosia, Cyprus  
6  
7 3 <sup>9</sup>Department of Meteorology, Ministry of Agriculture, Rural Development and  
8 4 Environment, Nicosia, Cyprus  
9  
10 5 <sup>10</sup>Department of Labour Inspection, Ministry of Labour and Social Insurance, Nicosia,  
11 6 Cyprus  
12  
13 7 <sup>11</sup>Harvard TH Chan School of Public Health, Boston, USA  
14  
15 8  
16  
17 9

**Correspondence:**

10 Panayiotis K. Yiallourous MD, PhD  
11 Shakolas Educational Center of Clinical Medicine  
12 Palaios Dromos Lefkosias-Lemesou 215/6  
13 2029, Aglantzia Nicosia  
14 Telephone No: +357 99470033, Fax No: +357 22895396  
15 Email: [yiallourous.panayiotis@ucy.ac.cy](mailto:yiallourous.panayiotis@ucy.ac.cy)  
16  
17  
18  
19  
20  
21  
22  
23  
24  
25  
26  
27  
28  
29  
30  
31  
32  
33  
34  
35  
36  
37  
38  
39  
40  
41  
42  
43  
44  
45  
46  
47  
48  
49  
50  
51  
52  
53  
54  
55  
56  
57  
58  
59  
60



1  
2  
3 **1 ABSTRACT (299 words)**  
4  
5

6 **2 Introduction:**  
7  
8

9  
10  
11  
12  
13  
14  
15  
16  
17  
18  
19  
20  
21  
22  
23  
24  
25  
26  
27  
28  
29  
30  
31  
32  
33  
34  
35  
36  
37  
38  
39  
40  
41  
42  
43  
44  
45  
46  
47  
48  
49  
50  
51  
52  
53  
54  
55  
56  
57  
58  
59  
60

3 Mediterranean countries experience frequent desert dust storm (DDS) events originating from  
4 neighbouring Sahara and Arabian deserts, which are associated with significant increase in mortality  
5 and hospital admissions, mostly from cardiovascular and respiratory diseases. Short-term exposure to  
6 ambient air pollution is considered as a trigger for symptomatic exacerbations of pre-existing  
7 paroxysmal atrial fibrillation (AF) and other types of heart arrhythmia. The MEDEA clinical  
8 randomised intervention study in adults with AF is funded by EU LIFE+ program to evaluate the  
9 efficacy of recommendations aiming to reduce exposure to desert dust and related heart arrhythmia  
10 effects.

11 **11 Methods and analysis:**  
12  
13  
14  
15  
16  
17  
18  
19  
20  
21  
22  
23  
24  
25  
26  
27  
28  
29  
30  
31  
32  
33  
34  
35  
36  
37  
38  
39  
40  
41  
42  
43  
44  
45  
46  
47  
48  
49  
50  
51  
52  
53  
54  
55  
56  
57  
58  
59  
60

12 The study is performed in three heavily exposed to desert dust regions of the Eastern Mediterranean:  
13 Cyprus, Israel, and Crete-Greece. Adults with paroxysmal AF and implanted pacemaker are recruited  
14 and randomized to three parallel groups: a) no intervention, b) interventions to reduce outdoor exposure  
15 to desert dust, c) interventions to reduce both outdoor and indoor exposure to particulate matter during  
16 desert dust episodes. Eligible participants are enrolled on a web-based platform which communicates,  
17 alerts and makes exposure reduction recommendations during DDS events. Exposure changes are  
18 assessed by novel tools (smartwatches with GPS and physical activity sensors, air pollution samplers  
19 assessing air quality inside and outside participant's homes, etc). Clinical outcomes include the AF  
20 burden expressed as the percentage of time with paroxysmal AF over the total study period, the  
21 incidence of ventricular arrhythmia episodes as recorded by the participants' pacemakers or  
22 cardioverters/defibrillators and the disease-specific Atrial Fibrillation Effect on QualiTy-of-Life  
23 (AFEQT) questionnaire.

24 **24 Ethics and dissemination:**

1  
2  
3 1 Local bioethics' authorities approved the study at all sites, according to national legislations (Cyprus:  
4  
5 2 National Bioethics Committee, Data Protection Commissioner and Ministry of Health; Greece,  
6  
7 3 Scientific Committee and Governing Board of the University General Hospital of Heraklion; Israel:  
8  
9 4 Institutional Review Board ("Helsinki committee") of the Soroka University Medical Center). The  
10  
11 5 findings will be publicised in peer-reviewed scientific journals, in international conferences, and in  
12  
13 6 professional websites and newsletters. A summary of the results and participants' interviews will be  
14  
15 7 included in a documentary in English, Greek and Hebrew.

16  
17  
18  
19 8 **Registration details:** ClinicalTrials.gov Identifier: NCT03503812, April 18, 2019  
20  
21  
22 9

## 23 24 25 10 **STRENGTHS AND LIMITATIONS OF THIS STUDY**

- 26  
27  
28 11 - Throughout the study, personal monitoring through wearable sensors assesses the compliance of  
29  
30 12 adults with Atrial Fibrillation (AF) to recommendations aiming to reduce the exposure to Desert  
31  
32 13 Dust Storms (DDS).  
33  
34 14 - Air cleaning devices continuously filter indoor air in homes of adults with AF during DDS  
35  
36 15 events.  
37  
38 16 - Personalized assessment reduces the risk of exposure missclassification  
39  
40 17 - The study uses validated tools to assess health outcomes, including AF burden and quality of life.  
41  
42 18 - Advanced age and/or other co-morbidities (e.g. impaired vision) of study participants may  
43  
44 19 compromise the use of wearable devices and smartphones.  
45  
46  
47 20  
48  
49  
50 21

51  
52  
53 22 **Key words:** Desert Dust, Asian Dust, Atrial Fibrillation, Public Health Intervention, Sensors  
54  
55  
56 23  
57  
58  
59  
60 24

## 1 INTRODUCTION

2 Exposure to air pollution is a well-established risk factor for cardiorespiratory morbidity and mortality  
3 [1, 2]. Among other outcomes, exposure to particulate matter is associated with higher incidence of  
4 cardiac infarction [3] and ventricular arrhythmias [4]. Furthermore, ambient air pollution is also  
5 associated with atrial fibrillation (AF), the most common heart rate disturbance, affecting almost 2% of  
6 the population worldwide, and a known risk factor for heart failure, stroke, hospital admission, and  
7 mortality [5-8].

8 Although the evidence on the relationship between particulate matter (PM) and incidence of heart  
9 arrhythmias comes from studies of anthropogenic particulate pollution (road traffic, industry, etc),  
10 particulate pollution in urban settlements may have substantial contributions from non-anthropogenic  
11 sources, such as Desert Dust Storms (DDS) [9]. This is very common for regions with geographical  
12 proximity to the global desert dust belt, such as the Mediterranean basin. In Mediterranean countries,  
13 DDS events may appear in more than 15% of the days of the year with the greater frequency and  
14 intensity of the events recorded in the south-eastern Mediterranean [10, 11].

15 Despite the natural origin of DDS events, recent evidence supports their strong association with adverse  
16 health outcomes such as increased all-cause and cause-specific mortality and morbidity [12-16]. Even  
17 though, direct evidence linking the incidence of AF episodes with DDS exposure is still lacking, recent  
18 studies have identified short term exposure to ambient air pollution as a trigger for AF episodes [17-  
19 19].

20 The current public health strategy across many countries during anthropogenic high pollution events is  
21 to issue alerts or warnings to the population, targeting vulnerable groups such as the known cardiac  
22 patients. These alerts usually are accompanied by recommendations to avoid vigorous outdoor activity  
23 and stay indoors during the events [20, 21]. Although there is a well-established rationale behind these  
24 recommendations [22], adherence has been found to vary widely, depending on several personal and  
25 other parameters [23]. In the case of DDS events a similar strategy of alerts and recommendations is  
26 followed on their appearance [20], but to date there is no real-life evidence supporting the efficacy of

1 these recommendations in reducing personal exposure to dust, either in the outdoor or the indoor  
2 environments, not or their role in mitigating the related health risks.

3 The “MEDEA (Mitigating the Health Effects of Desert Dust Storms Using Exposure-Reduction  
4 Approaches) Atrial Fibrillation study” has been designed to study the feasibility and effectiveness of  
5 simple exposure reduction recommendations (including behavioural changes with/without indoor air  
6 cleaners vs no intervention) in a randomised cohort of AF patients in parallel groups during DDS events  
7 in South-Eastern Mediterranean countries. This behavioural intervention study will quantify the impact  
8 of these recommendations both in terms of change in personal exposure to air pollution and in terms of  
9 AF burden reduction and improvement in Health-Related Quality of Life (HRQoL). The project is  
10 carried out by an eight-partner consortium across three heavily DDS-exposed sites in the Eastern  
11 Mediterranean, Cyprus, Israel, and Crete-Greece. The study benefits from a series of novel  
12 environmental exposure assessment tools such as smartwatches equipped with GPS and physical  
13 activity sensors that enable the objective assessment of personal compliance to the recommendations,  
14 while the availability of air pollution samplers allows the quantification of outdoor and indoor air  
15 pollution exposure among the study population.

## 17 **METHODS AND ANALYSIS**

18 The SPIRIT checklist has been used for this report [24].

### 19 ***Population***

20 The target population are men and women with AF and previously implanted dual lead (atrial and  
21 ventricular) pacemaker or implantable cardioverter- defibrillator (ICD), who attend the heart arrhythmia  
22 clinics at Nicosia General Hospital in Cyprus, Soroka Clinical Research Center (SCRC) in Beer-Sheba,  
23 Israel and University Hospital of Heraklion, Crete, Greece. Additional details on the recruitment of  
24 participants are provided in Supplementary Material. Screening of the AF patients at each site started  
25 in Fall 2018 and MEDEA personnel continues to identify and follow-up eligible AF patients throughout

1 the three follow-up periods in 2019, 2021 and 2022. The SPIRIT flow diagram for the AF study is  
2 presented in Figure 1.

### 3 ***Eligibility criteria***

4 Eligible for the study are patients with permanent atrial or dual chamber pacemakers or ICDs implanted  
5 at least two months prior to randomization, with:

6 a. History of paroxysmal AF and

7 b. Detection of AF episodes in pacemaker/ICD monitoring of >6 min in duration.

8 The study puts no limitations on patients' medication regimens during the study period.

9 Exclusion criteria are permanent AF, reversible causes of AF (e.g. hyperthyroidism), inability to  
10 understand and use study tools (smartphones, software applications), active smoking, terminal illness,  
11 or not living at least 5 days per week in the same household.

### 13 ***Study design***

14 Patients are randomized with a 1:1:1 ratio, using a random assignment tool, into three parallel groups:  
15 *Group 1*; no additional intervention during DDS ('business as usual' scenario), *Group 2*; interventions  
16 for outdoor exposure reduction, *Group 3*; combined interventions for both outdoor and indoor exposure  
17 reduction. The study design offers the opportunity to assess a) outdoor exposures to PM, b) indoor  
18 exposures to PM and c) related health outcomes in three parallel groups during the same events of DDS  
19 with and without intervention measures.

### 20 ***Study interventions and recommendations***

21 To reduce the outdoor and indoor exposure to DDS pollution, relevant recommendations have been  
22 developed. In brief, for outdoor exposure reduction intervention, it is recommended to the participants  
23 to stay indoors, and avoid any intense physical activity outdoors, competitive sports and unnecessary  
24 walks (Group 2 & Group 3). For indoor exposure reduction intervention, it is recommended to close  
25 doors and windows, to seal possible openings around doors and windows minimizing outdoor air  
26 penetration, and to filter indoor air by using continuously an air cleaning device (Coway Storm 1516D,

1  
2  
3 1 Coway, South Korea, see Supplementary Material for further details). Indoor exposure reduction  
4  
5 2 measures are implemented at the households of the participants in Group 3. In order to enhance uptake  
6  
7 3 and acceptability of the recommendations, we produced relevant audiovisual spots with animated  
8  
9 4 guidelines in Greek, Hebrew and English languages. The English version for the outdoor exposure  
10  
11 5 reduction intervention (Group 2, Video S1) and for the outdoor and indoor exposure reduction  
12  
13 6 intervention (Group 3, Video S2) are available in Supplementary Material.

#### 16 7 *MEDena® Health-Hub*

18  
19  
20 8 For the purposes of the project, a patient-centered web-based platform (the MEDena® Health-Hub) and  
21  
22 9 a smart phone application (the MEDEApp®) have been developed. These tools receive input from  
23  
24 10 existing models that forecast DDS events in the countries that take part in the study and provide alerts  
25  
26 11 to participants and researchers with the appearance of DDS events through text messaging and  
27  
28 12 smartphone applications, coupled with relevant exposure reduction recommendations (personalized to  
29  
30 13 each participant, according to the randomization group they belong - Group 1, 2 or 3). The forecasting  
31  
32 14 models for desert dust rely on the transport scheme of the desert dust, the proximity of the given area  
33  
34 15 to the desert source and other factors [25]. The platform algorithm takes into account these forecasts for  
35  
36 16 DDS and issues alerts to participants based on increased PM concentrations (including both particles of  
37  
38 17 desert dust and anthropogenic origin) compared to site-specific background levels as described  
39  
40 18 previously [26]. Of note, so far there is no well-established classification system for DDS severity, thus  
41  
42 19 the forecasting models and alert algorithms treat all DDS events equally [27].

43  
44  
45  
46 20 Using cloud technologies, the above mentioned tools offer the opportunity to store health and exposure  
47  
48 21 data from all participants (Groups 1, 2 and 3), as these are recorded through the wearable sensors and  
49  
50 22 online questionnaires.

51  
52  
53 23 Following randomization, participant's socio-demographic characteristics, medical and medication  
54  
55 24 history, as well as information on household location and characteristics, are uploaded to the MEDena®  
56  
57 25 Health-Hub. In addition, a wearable sensor (EMBRACE™ smartwatch (Embrace Tech LTD, Cyprus)  
58  
59 26 is provided to the participant, who is asked to wear it daily throughout the study period, except during

1  
2  
3 1 bedtime, bathing, and swimming. The study personnel are responsible to train the AF patients in the  
4  
5 2 tools and procedures to be followed during the study. A leaflet with instructions on the use of the  
6  
7 3 EMBRACE™ smartwatch and MEDEApp is also provided to the participants. Additional details on the  
8  
9 4 MEDena® Health-Hub and MEDEA App have been published previously [26].  
10  
11

#### 12 5 *Exposure assessment*

13  
14  
15 6 i. Wearable sensors: Physical activity as well as time spent outdoors are assessed by the sensors of the  
16  
17 7 EMBRACE™ smartwatch. The smartwatch is supplied with global positioning system (GPS), which  
18  
19 8 records continuously the time the participant spends indoors and outdoors, and activity tracking  
20  
21 9 (pedometer) hardware and software, which records steps and heart rate. In addition, the smartwatch also  
22  
23 10 includes an embedded sim card and Wi-Fi connectivity and can be used as a stand-alone device. Lastly,  
24  
25 11 the software can synchronize the sensors, so that data are transferred to the cloud database marked with  
26  
27 12 the same timestamp.  
28  
29  
30

31 13 ii. Air pollution sensors: Particle samplers (Harvard High Volume Cascade Impactors, Harvard  
32  
33 14 University, USA) are placed outside and inside representative participants' houses. Furthermore,  
34  
35 15 indoor, commercial low volume air quality sensors (OPC-N3 Optical Particle Counters, Alphasense,  
36  
37 16 United Kingdom) are used to assess the levels of indoor exposure to PM across the three intervention  
38  
39 17 groups. The indoor and outdoor particle samplers use Teflon filters which are analysed to give the  
40  
41 18 concentrations of PM<sub>10</sub>, PM<sub>2.5</sub>, black carbon (BC) and elements inside and outside representative houses  
42  
43 19 during DDS and DDS-free days.  
44  
45  
46

47 20 iii. Questionnaires: Each participant is asked to complete an activity questionnaire following each DDS  
48  
49 21 event, which assesses the reported compliance to the recommendations. A schematic diagram of the AF  
50  
51 22 study is presented in Figure 2.  
52  
53

54 23 The recordings of wearable GPS and activity sensors are coupled with the measurements collected from  
55  
56 24 the air pollution samplers and the questionnaires to provide a much higher spatiotemporal accuracy for  
57  
58 25 personal air pollution exposure, and an estimate of the compliance to the intervention. To ensure  
59  
60

1  
2  
3 1 minimal technical problems with the wearables and devices, as well as to facilitate the compliance of  
4  
5 2 the participants, we maintain an extended support system characterized by frequent communication  
6  
7 3 with participants and their families and implement simple and cost-effective setting adjustments to the  
8  
9 4 device to ensure systematic activation of the data collection application at regular time intervals,  
10  
11 5 increase battery duration and facilitate uninterrupted operation of smartwatch background process [28].  
12

### 13 14 15 6 ***Baseline and Follow-up Clinical Assessments***

16  
17  
18 7 Eligible AF patients after screening are invited for a baseline clinical assessment, which includes  
19  
20 8 detailed questions on socio-demographic characteristics, health symptoms, particularly heart  
21  
22 9 arrhythmias symptoms, utilization of medical care, medication history and household environmental  
23  
24 10 characteristics, including tobacco smoke exposure. A baseline assessment of the AF/ventricular  
25  
26 11 arrhythmia episodes is obtained after downloading relevant data from the participants' pacemakers or  
27  
28 12 ICDs.

29  
30  
31 13 Follow-up periods span for 6 months and include monitoring of the daily location and physical activity  
32  
33 14 of AF patients using the smartwatches. Phone interviews at baseline and then at every 1 month  
34  
35 15 throughout the follow-up period are performed collecting information on heart arrhythmia symptoms  
36  
37 16 control, medication use, unscheduled visits to health professional for arrhythmias and health related  
38  
39 17 quality of life using the Atrial Fibrillation Effect on QualiTy-of-Life (AFEQT, license number:  
40  
41 18 20171404) questionnaire [29]. Incidence of AF/ventricular arrhythmia episodes is recorded daily using  
42  
43 19 the already implanted participants' pacemaker or ICD during the follow-up period. The recorded  
44  
45 20 episodes are downloaded by interrogation of the pacemaker or ICD after the end of the study period  
46  
47 21 during a visit to the Hospital Arrhythmia Clinic. The timeline and description of baseline and follow-  
48  
49 22 up assessments in the AF panel study are presented in Figure 3. Non-participation to the clinical visits  
50  
51 23 was the only reason for discontinuation of the study participation. Additional details on the intervention  
52  
53 24 implementation are provided in Supplementary Material.

### 54 55 56 57 58 25 ***Atrial fibrillation outcomes and data analysis***

59  
60



1 The primary health outcome in the study is the reduction in the AF burden defined as the percentage of  
2 time with AF during the whole study period. A 20% reduction in the AF burden is considered as  
3 clinically significant. For the primary analysis, we will compare the combined effect in the two  
4 intervention groups versus the control group. Next, we will make comparisons between each of the  
5 intervention groups and the control group and between the intervention groups. Furthermore, for health-  
6 related quality of life, changes equal or greater than ( $\pm$ ) 5 points in the AFEQT questionnaire score are  
7 considered clinically significant. Other health outcomes include the presence or absence of arrhythmia  
8 symptoms in the prior 4-week period, heart rate variability, arrhythmia medication use and unscheduled  
9 hospital visits for heart arrhythmias. Apart from the health outcomes, the exposure reduction across the  
10 intervention groups will be assessed as an outcome of this study, estimating directly the compliance and  
11 the effectiveness of the recommendations.

12 i. Sample size calculation: There are no studies that evaluated the reduction in AF burden attributed to  
13 the reduction in exposure to ambient air pollution. Nevertheless, assuming a mean follow-up period of  
14 6 months and an effect size of 20% change in the outcome, a study sample size of 118 is required to  
15 demonstrate a statistically significant result. This number is estimated for performing a two-way  
16 repeated measures ANOVA statistical test for the comparison of the intervention and control groups  
17 and assuming an alpha value at 0.05, power of 80% and a 50% correlation between repeated  
18 measurements.

19 ii. Statistical analysis plan: Descriptive statistics will be presented using summaries of key variables in  
20 the form of mean (standard deviation) and median (range) for normally and non-normally distributed  
21 variables respectively. For categorical variables, the distribution in percentages will be presented.  
22 Comparisons between intervention and control groups will be carried out using the two-way repeated  
23 measures ANOVA statistical test for continuous variables and the Chi-Square test for categorical  
24 variables. The statistical analysis plan for the impact of intervention on exposure will include the  
25 estimation of the fraction of outdoor particles that penetrate indoors and remain suspended using the  
26 infiltration factor approach as described previously [30] and will employ multiple linear regression  
27 models to quantify the effect of intervention measures on indoor PM levels. The statistical analysis for  
28 the impact of intervention on health-related quality of life (AFEQT score) will rely on a linear mixed

1 effects (hierarchical) regression model which will include fixed effects for intervention group and  
2 subject-specific random intercepts. The model will be adjusted for several covariates including age,  
3 gender, year of study, site of study and climatic factors.

## 5 **ETHICS AND DISSEMINATION**

6 The MEDEA AF panel study has been approved by national authorities at all sites. In Cyprus, approvals  
7 have been obtained from the Cyprus National Bioethics Committee (EEBK EΠ 2017.01.141), by the  
8 Data Protection Commissioner (No. 3.28.223) and Ministry of Health (No 5.34.01.7.2E). In Greece,  
9 approvals have been obtained from the Scientific Committee (25/04/2018, No: 1748) and the Governing  
10 Board of the University General Hospital of Heraklion (25/22/08/2018). In Israel, approval has been  
11 obtained from the Institutional Review Board (“Helsinki committee”) of the Soroka University Medical  
12 Center (No 0374-17-SOR). Participants sign the informed consent from the corresponding center at  
13 recruitment. The study has been registered and approved by the clinicaltrials.gov online repository  
14 (ClinicalTrials.gov Identifier: NCT03503812)

### 15 *Dissemination plan*

16 The study findings will be disseminated according to the predefined dissemination plan of the LIFE  
17 MEDEA project. The project dissemination plan includes publication of the study findings in  
18 international peer reviewed scientific journals, as well as international scientific conferences, with  
19 authorship eligibility as defined by the International Committee of Medical Journal Editors  
20 recommendations. In addition, the findings will be also communicated to the scientific community,  
21 regulatory authorities, patient organizations and the general public through publication of a series of  
22 short-piece articles for professional websites and newsletters, as well as through the organization of  
23 educational activities and open public fairs in the three study sites. Lastly, the LIFE MEDEA project  
24 dissemination plan also includes the production of 50-minute documentary with a summary of the study  
25 findings that will be made available in English, Greek and Hebrew languages. The anonymised study

1 dataset and the statistical code will be made available online in an appropriate, open access, public  
2 repository.

### 3 *Patient and Public Involvement*

4 The above-mentioned documentary will include interviews from study participants and participating  
5 clinicians reporting their experiences during the study.

## 8 **LIST OF ABBREVIATIONS**

9 **DDS** – Desert Dust Storms

10 **PM<sub>10</sub>** – Particulate Matter <10 µm

11 **PM<sub>2.5</sub>** – Particulate Matter <2.5 µm

12 **AF** – Atrial Fibrillation

13 **GPS** – Global Positioning system

14 **BC** – Black Carbon

15 **ICD** – Implantable Cardioverter-Defibrillator

16 **AFEQT** – Atrial Fibrillation Effect on Quality of Life

## 18 **AUTHORS' COMPETING INTERESTS**

19 The authors declare no conflict of interest

## 20 **FUNDING STATEMENT**

21 This work was supported by the LIFE 2016 Programme (LIFE16 CCA/CY/000041) of the European  
22 Commission. The funders had and will not have a role in study design, data collection and analysis,  
23 decision to publish, or preparation of the manuscript. Funder contact info: [easme-life@ec.europa.eu](mailto:easme-life@ec.europa.eu)

1  
2  
3 1  
4  
5  
6 2**AUTHORS CONTRIBUTIONS**

7  
8 3 **PAgnostopoulou:** Methodology, Data curation, Writing-Original draft preparation, Review &  
9  
10 4 Editing; **PKouis:** Methodology, Investigation, Software, Data curation, Project Administration Writing-  
11  
12 5 Original draft preparation, Review & Editing; **SP:** Conceptualization, Methodology, Data curation,  
13  
14 6 Writing-Original draft preparation; **NM:** Methodology, Writing - Review & Editing; **IP:** Data curation,  
15  
16 7 Investigation, Writing – Review & Editing; **PAvraamides:** Data curation, Investigation, Writing –  
17  
18 8 Review & Editing; **ES:** Conceptualization, Methodology, Investigation, Resources, Writing - Review  
19  
20 9 & Editing; **IA:** Data curation, Investigation, Writing – Review & Editing; **VN:** Conceptualization,  
21  
22 10 Methodology, Writing - Review & Editing, Project Administration; **GS:** Conceptualization, Data  
23  
24 11 Curation, Software, Visualisation, Writing - Review & Editing; **ER:** Conceptualization, Data Curation,  
25  
26 12 Software, Visualisation, Writing - Review & Editing; **CK:** Visualisation, Resources, Writing - Review  
27  
28 13 & Editing; **FT:** Conceptualization, Methodology, Resources, Software, Writing - Review & Editing;  
29  
30 14 **CS:** Conceptualization, Methodology, Resources, Writing - Review & Editing; **PKoutrakis:**  
31  
32 15 Conceptualization, Methodology; Software, Validation, Resources, Writing - Review & Editing; **PY:**  
33  
34 16 Conceptualization, Methodology; Software, Validation, Writing - Review & Editing, Supervision,  
35  
36 17 Funding acquisition.

37  
38  
39  
40  
41 18  
42  
43**ACKNOWLEDGMENTS**

44  
45  
46  
47 20 The authors are grateful to the members of the MEDEA Advisory Committee for the continuous  
48  
49 21 feedback provided to the LIFE MEDEA project, the hospital administrations for their support to carry  
50  
51 22 out the project and the participants and their family members for their contribution to the project.

52  
53  
54 23  
55  
56  
57 24  
58  
59 25  
60

## 1 REFERENCES

- 2
- 3
- 4
- 5
- 6
- 7
- 8 1 Di Q, Dai L, Wang Y, et al. Association of short-term exposure to air pollution with mortality in  
9 older adults, *JAMA* 2017;318:2446-56.
- 10
- 11 2 Pope III CA, Dockery DW. Health effects of fine particulate air pollution: lines that connect, *J Air  
12 Waste Manage Assoc* 2006;56:709-42.
- 13
- 14 3 Wu Y, Li M, Tian Y, et al. Short-term effects of ambient fine particulate air pollution on inpatient  
15 visits for myocardial infarction in Beijing, China, *Environmental Science and Pollution Research*  
16 2019;26:14178-83.
- 17
- 18 4 Folino F, Buja G, Zanotto G, et al. Association between air pollution and ventricular arrhythmias in  
19 high-risk patients (ARIA study): a multicentre longitudinal study, *The Lancet Planetary Health*  
20 2017;1:e58-64.
- 21
- 22 5 Developed with the Special Contribution of the European Heart Rhythm Association (EHRA),  
23 Endorsed by the European Association for Cardio-Thoracic Surgery (EACTS), Authors/Task Force  
24 Members, et al. Guidelines for the management of atrial fibrillation: the Task Force for the  
25 Management of Atrial Fibrillation of the European Society of Cardiology (ESC), *Eur Heart J*  
26 2010;31:2369-429.
- 27
- 28 6 Meyre P, Blum S, Berger S, et al. Risk of hospital admissions in patients with atrial fibrillation: a  
29 systematic review and meta-analysis, *Can J Cardiol* 2019;35:1332-43.
- 30
- 31 7 Lowres N, Olivier J, Chao T, et al. Estimated stroke risk, yield, and number needed to screen for  
32 atrial fibrillation detected through single time screening: a multicountry patient-level meta-analysis of  
33 141,220 screened individuals, *PLoS medicine* 2019;16:e1002903.
- 34
- 35 8 Ruddox V, Sandven I, Munkhaugen J, et al. Atrial fibrillation and the risk for myocardial infarction,  
36 all-cause mortality and heart failure: a systematic review and meta-analysis, *European journal of  
37 preventive cardiology* 2017;24:1555-66.
- 38
- 39 9 Goodsite ME, Hertel O, Johnson MS, et al. Urban air quality: Sources and concentrations. In:  
40 Anonymous . Air Pollution Sources, Statistics and Health Effects: Springer 2021:193-214.
- 41
- 42 10 Stafoggia M, Zauli-Sajani S, Pey J, et al. Desert Dust Outbreaks in Southern Europe: Contribution  
43 to Daily PM<sub>10</sub> Concentrations and Short-Term Associations with Mortality and Hospital  
44 Admissions, *Environ Health Perspect* 2016;124:413-9 doi:10.1289/ehp.1409164 [doi] [published  
45 Online First: Apr].
- 46
- 47 11 Querol X, Pey J, Pandolfi M, et al. African dust contributions to mean ambient PM<sub>10</sub> mass-levels  
48 across the Mediterranean Basin, *Atmos Environ* 2009;43:4266-77.
- 49
- 50 12 Griffin DW. Atmospheric movement of microorganisms in clouds of desert dust and implications  
51 for human health, *Clin Microbiol Rev* 2007;20:459-77.
- 52
- 53 13 Middleton N, Yiallourous P, Kleanthous S, et al. A 10-year time-series analysis of respiratory and  
54 cardiovascular morbidity in Nicosia, Cyprus: the effect of short-term changes in air pollution and dust  
55 storms, *Environ Health* 2008;7:1-16.
- 56
- 57 14 Neophytou AM, Yiallourous P, Coull BA, et al. Particulate matter concentrations during desert dust  
58 outbreaks and daily mortality in Nicosia, Cyprus, *Journal of Exposure Science & Environmental  
59 Epidemiology* 2013;23:275-80.
- 60

- 1  
2  
3 1 15 Domínguez-Rodríguez A, Báez-Ferrer N, Abreu-González P, et al. Impact of Desert Dust Events  
4 2 on the Cardiovascular Disease: A Systematic Review and Meta-Analysis, *Journal of clinical medicine*  
5 3 2021;10:727.  
6  
7 4 16 Al B, Bogan M, Zengin S, et al. Effects of dust storms and climatological factors on mortality and  
8 5 morbidity of cardiovascular diseases admitted to ED, *Emergency medicine international* 2018;2018.  
9  
10 6 17 Link MS, Luttmann-Gibson H, Schwartz J, et al. Acute exposure to air pollution triggers atrial  
11 7 fibrillation, *J Am Coll Cardiol* 2013;62:816-25.  
12  
13 8 18 Yitshak Sade M, Vodonos A, Novack V, et al. Can air pollution trigger an onset of atrial  
14 9 fibrillation: a population-based study, *Air Quality, Atmosphere & Health* 2015;8:413-20.  
15  
16 10 19 Lee HH, Pan SC, Chen BY, et al. Atrial fibrillation hospitalization is associated with exposure to  
17 11 fine particulate air pollutants, *Environ Health* 2019;18:1-8.  
18  
19 12 20 Kinni P, Kouis P, Dimitriou H, et al. Health effects of desert dust storm events in the south-eastern  
20 13 Mediterranean: perceptions and practices of local stakeholders, *East Mediterr Health J* 2021;27:1092-  
21 14 101 doi:10.26719/emhj.21.037 [doi] [published Online First: Dec 1].  
22  
23 15 21 Kelly FJ, Fuller GW, Walton HA, et al. Monitoring air pollution: Use of early warning systems for  
24 16 public health, *Respirology* 2012;17:7-19.  
25  
26 17 22 Holgate S. Review of the UK Air quality index. A report by the Committee on the medical effects  
27 18 of air pollutants, *Health Protection Agency, London* 2011.  
28  
29 19 23 D'Antoni D, Smith L, Auyeung V, et al. Psychosocial and demographic predictors of adherence  
30 20 and non-adherence to health advice accompanying air quality warning systems: a systematic review,  
31 21 *Environ Health* 2017;16:1-18.  
32  
33 22 24 Chan A, Tetzlaff JM, Gøtzsche PC, et al. SPIRIT 2013 explanation and elaboration: guidance for  
34 23 protocols of clinical trials, *BMJ* 2013;346.  
35  
36 24 25 Querol X, Tobías A, Pérez N, et al. Monitoring the impact of desert dust outbreaks for air quality  
37 25 for health studies, *Environ Int* 2019;130:104867.  
38  
39 26 26 Kouis P, Papatheodorou SI, Kakkoura MG, et al. The MEDEA childhood asthma study design for  
40 27 mitigation of desert dust health effects: implementation of novel methods for assessment of air  
41 28 pollution exposure and lessons learned, *BMC pediatrics* 2021;21:1-9.  
42  
43 29 27 Benedetti A, Reid JS, Knippertz P, et al. Status and future of numerical atmospheric aerosol  
44 30 prediction with a focus on data requirements, *Atmospheric Chemistry and Physics* 2018;18:10615-43.  
45  
46 31 28 Michanikou, A., Kouis, P., Karanicolas, K., Yiallourous, P. K.. Setup of Consumer Wearable  
47 32 Devices for Exposure and Health Monitoring in Population Studies, *J. Vis. Exp.* (192), e63275, doi:  
48 33 (2023).  
49  
50 34 29 Spertus J, Dorian P, Bubien R, et al. Development and validation of the Atrial Fibrillation Effect  
51 35 on Quality-of-Life (AFEQT) Questionnaire in patients with atrial fibrillation, *Circulation:*  
52 36 *Arrhythmia and Electrophysiology* 2011;4:15-25.  
53  
54 37 30 Diapouli E, Chaloulakou A, Koutrakis P. Estimating the concentration of indoor particles of  
55 38 outdoor origin: A review, *J Air Waste Manage Assoc* 2013;63:1113-29.  
56  
57 39  
58  
59 40  
60

1  
2  
3 **1 Figure Legends:**  
4

5  
6 **2 Figure 1: MEDEA Atrial Fibrillation study SPIRIT flow diagram:** The schedule of enrolment,  
7  
8 **3 allocation, interventions and assessments in the AF panel study according to SPIRIT template.**  
9

10  
11 **4**  
12  
13 **5 Figure 2: MEDEA Atrial Fibrillation study schematic diagram.** The bidirectional MEDena®  
14  
15 **6 Health-Hub is updated with meteorological forecasting and air-quality information regarding DDS**  
16  
17 **7 events and sends alerts and exposure reduction guidelines to AF patients. At the same time, the cloud**  
18  
19 **8 database is automatically collecting the physical activity and GPS data from the smartwatches worn by**  
20  
21 **9 the participants. Researchers also manually upload participants' clinical data and air quality**  
22  
23 **10 measurements. DDS: Desert Dust Storm, AF: Atrial Fibrillation HRQoL: Health Related Quality of**  
24  
25 **11 Life, AFEQT: Atrial Fibrillation Effect on QualiTY of Life questionnaire, GPS: Global Positioning**  
26  
27 **12 System, SMS: Short Messaging Service text message.**  
28  
29

30  
31 **14 Figure 3: MEDEA Atrial Fibrillation study assessments timeline.** Timeline of baseline and follow-  
32  
33 **15 up assessments in Atrial Fibrillation panel study. DDS: Desert Dust Storm, AF: Atrial Fibrillation**  
34  
35 **16 HRQoL: Health Related Quality of Life, AFEQT: Atrial Fibrillation Effect on QualiTY of Life**  
36  
37 **17 questionnaire, ICD: Implantable Cardioverter Defibrillator.**  
38  
39

40  
41  
42  
43  
44  
45  
46  
47  
48  
49  
50  
51  
52  
53  
54  
55  
56  
57  
58  
59  
60





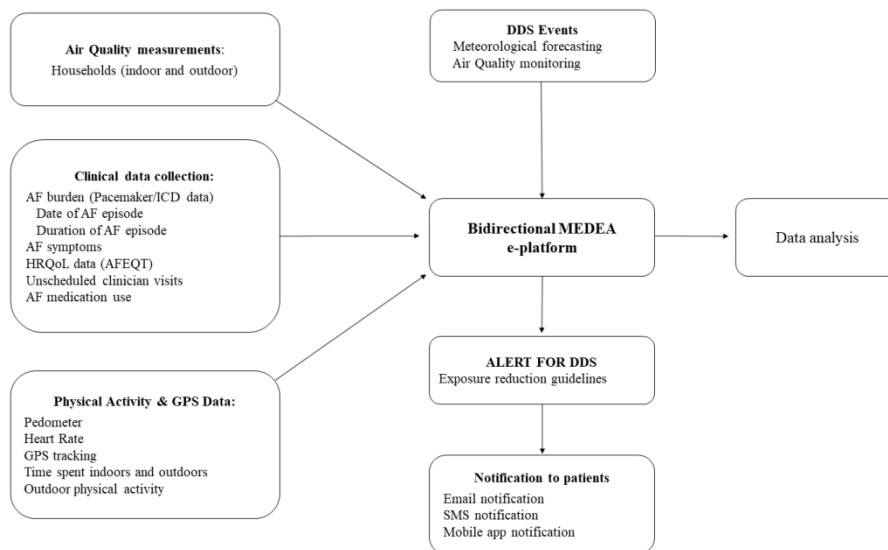

405x250mm (96 x 96 DPI)

1  
2  
3  
4  
5  
6  
7  
8  
9  
10  
11  
12  
13  
14  
15  
16  
17  
18  
19  
20  
21  
22  
23  
24  
25  
26  
27  
28  
29  
30  
31  
32  
33  
34  
35  
36  
37  
38  
39  
40  
41  
42  
43  
44  
45  
46  
47  
48  
49  
50  
51  
52  
53  
54  
55  
56  
57  
58  
59  
60

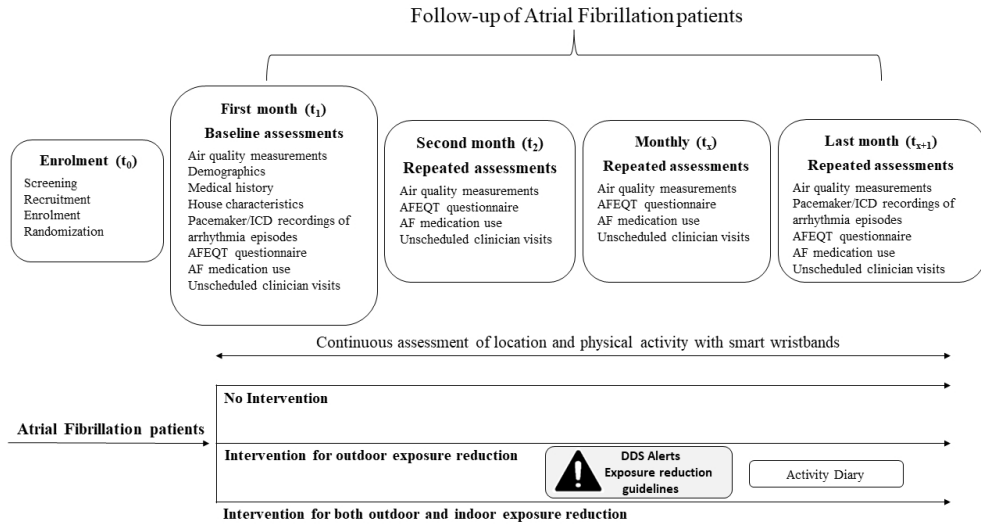

338x190mm (96 x 96 DPI)

## SUPPLEMENTARY MATERIAL

### Methods and analysis

#### *Details of recruiting AF patients*

In order to facilitate recruitment of AF patients, a network of Cardiologists who run large cardiac arrhythmia clinics has been established in collaborating health centers (Nicosia General Hospital, University Hospital of Heraklion and Soroka Research Clinical Center) at each of the three countries. Relations have also been established with the Clinical and Nursing staff of the Clinics and Patients' Associations and the details of the project have been explained to them. Screening of the AF patients at each site started in Summer 2018. The medical/symptom and medication history and downloads from patients' pacemakers or ICDs are obtained and examined in order to assess whether the candidate for enrolment fulfils the eligibility criteria. The age itself has not been used as a limiting factor for the participation in the study, but the inability to understand and use study tools (smartphones, software applications), due to age, intellectual disability, etc. Also, patients on terminal illness, bed-bound patients and/or patients with impaired physical mobility are excluded from the study, due to the limited outdoor exposure. The patients' recruitment has been facilitated by the medical staff of cardiology clinics, who are aware of the medical history (e.g. permanent AF, other reversible causes of AF), the comorbidities (e.g. visual impairment, hearing impairment), the lifestyle habits (e.g. active smoking, regular change of household) and the readiness of each patient to participate in the study and comply with the basic requirements.

Patients are able to ask questions for clarification of all aspects of the program. Eligible AF patients are then invited to participate in the MEDEA program after they give written informed consent. An independent researcher provides the sequential number and the assignment group at the baseline clinical visit, who is responsible also for the participants' training on the use of devices after recruitment. Due to the nature of the study, the participants couldn't be blinded to the assignment group.

Several old types of pacemakers implanted to AF patients do not store more than 16 arrhythmia episodes. Thus, for the performance of the AF panel study we rely mainly on patients with implanted ICD's or modern pacemakers such as Advisa (Advisa DR MRI™ and Advisa SR MRI™, Medtronic, United States) and Adapta (Adapta DRTM and Adapta SRTM, Medtronic, United States). These pacemakers save all fast rate episodes, regardless of the time interval between interrogations of the device.

#### *Details on wearable devices*

One of the main and earliest challenges of the project was the memory capacity and energy efficiency of the device, as this may affect the credibility of the collected data. In order to overcome this issue, we evaluated several commercially available smart watch devices and we chose the LEMFO-LM25 smartwatch equipped with the EMPBRACETM software (Embrace Tech LTD, Cyprus). This smartwatch does not require manual synchronization with another

1  
2  
3 device but acts as a stand-alone device that is able to upload data automatically when it gets in  
4 contact with the WI-FI network at the participant's house.  
5

### 6 *Details of implementation of the intervention*

7

8 When predefined algorithms of PM<sub>10</sub> levels are fulfilled, MEDEA air pollution scientists at  
9 each study site, promptly communicate alerts for the appearance of DDS through the e-platform  
10 to the participants in the intervention legs of the study, but not to the participants in the control  
11 group. To this effect, emails, smartphone applications and text messaging are used to  
12 disseminate the specific exposure reduction recommendations in text and animated videos. The  
13 participants are familiarised at recruitment with the respective intervention recommendations  
14 through animated videos and take home hard-cover flyers printed in a user-friendly layout, to  
15 encourage compliance to the intervention.  
16  
17  
18

19 In participants who are randomized to the combined outdoor and indoor intervention, we also  
20 arrange at recruitment to visit their houses within the same week and install air-cleaning  
21 devices. Instructions on the use of air cleaners are provided to patients on site. During the  
22 home visit, we also assess the placement, and thus functionality of the air cleaner, in a room of  
23 the house where the participant spends most of the time (typically between bedroom and sitting  
24 room). Reminders are taped on the air cleaners advising to keep them functioning continuously,  
25 throughout the six-month study period. Monthly clean-ups of the HEPA filters of the air cleaner  
26 are performed by the research staff, as recommended by the manufacturer.  
27  
28  
29  
30  
31  
32  
33  
34

### 35 **Study organisation & coordination**

36

#### 37 38 DATA ACCESS, OWNERSHIP OF RESULTS, DATA TRANSFER AND PUBLICATION 39 AGREEMENTS 40

41 A consortium agreement signed by all participating centers sets the obligations for data access,  
42 ownership of results, data transfer and publication agreements.  
43  
44  
45

#### 46 RESPONSIBILITIES AND COMMITTEES

47

48 Coordinating center: Apart from the coordination of the study, the coordinating center is responsible  
49 for the acquisition of rights for tools usage.  
50

51 Data management team: The team consists of researchers from the three centers aiming to ensure data  
52 collection, data cleaning and the appropriate preparation of the study dataset.  
53

54 Steering Committee: The Steering Committee scrutinizes the quality of the project performance, acts  
55 as a supervisory body to ensure that the work described in individual actions is carried out and is  
56 responsible for troubleshooting. The members of the steering committee include the Project  
57 Coordinator, Project Manager, and the Leaders of all other project partners (Soroca Clinical Research  
58 Center, University of Crete, Cyprus University of Technology, E.n.A. Consulting, Department of  
59 Labor Inspection, Cyprus Broadcasting Corporation, Cyprus Department of Meteorology).  
60

1  
2  
3 External Advisory Committee: The external advisory committee is responsible to counsel the project  
4 and to help transform our results to policies. It consists of 33 members from relevant regulatory  
5 authorities and interested stakeholders from all participating sites (Cyprus, Greece, Israel).  
6

7 A data monitoring committee was not needed for this study, because the participants are adults, the  
8 behavioural intervention has very low chance of producing harm, and the duration of the follow-up  
9 period for each participant is short (6 months).  
10

## 11 12 13 PARTICIPANT CONFIDENTIALITY 14 15

### 16 Administrative safeguards: 17

18 Data are completely anonymized and encrypted prior to sending to the central database. The full record  
19 of AF participants with names, addresses, and other personal information are kept by the principal  
20 investigator (PY) at the Medical School of the University of Cyprus and only authorized personnel will  
21 have access to this data (LIFE MEDEA+ project scientist PK). All collected data will be analyzed and  
22 discussed between program partners only by using codes (a participant identification number  
23 (Participant ID, PID) to ensure that the anonymity of the participants is fully preserved and to maintain  
24 confidentiality.  
25  
26

### 27 Technical safeguards: 28

29 Electronic access to patient data requires a user name and password that is only held by authorized  
30 personnel. All computer entry and networking programs are done using PIDs only. In addition, the  
31 Microsoft Azure storage platform used for the purpose of data storage and backup, is Health Insurance  
32 Portability and Accountability Act (HIPAA) compliant that establishes requirements for the use,  
33 disclosure, and safeguarding of individually identifiable health information.  
34  
35

36 The University of Cyprus has a policy that requires computer users not to leave computers unattended  
37 and not to exchange entry codes between them. Still, it is worth mentioning that after a few hours of  
38 non-use, the computer automatically turns off and locks again, requiring the use of the input code again.  
39 In the event that a computer containing personal data is no longer used, the University of Cyprus ensures  
40 that the data will either be transferred or destroyed.  
41  
42

### 43 Physical safeguards: 44

45 The Medical School of the University of Cyprus is housed at the Shakolas Educational Center, a safe  
46 building on Nicosia-Limassol Old Road, in Aglantzia, Nicosia. The building is protected internally and  
47 with the supervision of the surrounding area, on a daily basis with a 24-hour security guard. The guard  
48 checks all incoming people in the building. Data that may be in print will be kept in a closet in the office  
49 of the Project Coordinator so that no unauthorized person has access to them. All records will be kept  
50 in a locked file cabinet.  
51  
52  
53  
54  
55  
56  
57  
58  
59  
60

# Reporting checklist for protocol of a clinical trial.

Based on the SPIRIT guidelines.

## Instructions to authors

Complete this checklist by entering the page numbers from your manuscript where readers will find each of the items listed below.

Your article may not currently address all the items on the checklist. Please modify your text to include the missing information. If you are certain that an item does not apply, please write "n/a" and provide a short explanation.

Upload your completed checklist as an extra file when you submit to a journal.

In your methods section, say that you used the SPIRIT reporting guidelines, and cite them as:

Chan A-W, Tetzlaff JM, Gøtzsche PC, Altman DG, Mann H, Berlin J, Dickersin K, Hróbjartsson A, Schulz KF, Parulekar WR, Krleža-Jerić K, Laupacis A, Moher D. SPIRIT 2013 Explanation and Elaboration: Guidance for protocols of clinical trials. *BMJ*. 2013;346:e7586

|                                             |                     | Reporting Item                                                                                               | Page Number |
|---------------------------------------------|---------------------|--------------------------------------------------------------------------------------------------------------|-------------|
| <b>Administrative information</b>           |                     |                                                                                                              |             |
| Title                                       | <a href="#">#1</a>  | Descriptive title identifying the study design, population, interventions, and, if applicable, trial acronym | 1           |
| Trial registration                          | <a href="#">#2a</a> | Trial identifier and registry name. If not yet registered, name of intended registry                         | 4           |
| Trial registration: data set                | <a href="#">#2b</a> | All items from the World Health Organization Trial Registration Data Set                                     | N/A         |
| Protocol version                            | <a href="#">#3</a>  | Date and version identifier                                                                                  | N/A         |
| Funding                                     | <a href="#">#4</a>  | Sources and types of financial, material, and other support                                                  | 14          |
| Roles and responsibilities: contributorship | <a href="#">#5a</a> | Names, affiliations, and roles of protocol contributors                                                      | 15          |

|    |                           |                     |                                                        |               |
|----|---------------------------|---------------------|--------------------------------------------------------|---------------|
| 1  | Roles and                 | <a href="#">#5b</a> | Name and contact information for the trial sponsor     | 14            |
| 2  | responsibilities:         |                     |                                                        |               |
| 3  | sponsor contact           |                     |                                                        |               |
| 4  | information               |                     |                                                        |               |
| 5  |                           |                     |                                                        |               |
| 6  |                           |                     |                                                        |               |
| 7  |                           |                     |                                                        |               |
| 8  | Roles and                 | <a href="#">#5c</a> | Role of study sponsor and funders, if any, in study    | 14            |
| 9  | responsibilities:         |                     | design; collection, management, analysis, and          |               |
| 10 | sponsor and funder        |                     | interpretation of data; writing of the report; and the |               |
| 11 |                           |                     | decision to submit the report for publication,         |               |
| 12 |                           |                     | including whether they will have ultimate authority    |               |
| 13 |                           |                     | over any of these activities                           |               |
| 14 |                           |                     |                                                        |               |
| 15 |                           |                     |                                                        |               |
| 16 |                           |                     |                                                        |               |
| 17 | Roles and                 | <a href="#">#5d</a> | Composition, roles, and responsibilities of the        | Supplementary |
| 18 | responsibilities:         |                     | coordinating centre, steering committee, endpoint      | material      |
| 19 | committees                |                     | adjudication committee, data management team,          |               |
| 20 |                           |                     | and other individuals or groups overseeing the         |               |
| 21 |                           |                     | trial, if applicable (see Item 21a for data            |               |
| 22 |                           |                     | monitoring committee)                                  |               |
| 23 |                           |                     |                                                        |               |
| 24 |                           |                     |                                                        |               |
| 25 |                           |                     |                                                        |               |
| 26 |                           |                     |                                                        |               |
| 27 | <b>Introduction</b>       |                     |                                                        |               |
| 28 |                           |                     |                                                        |               |
| 29 |                           |                     |                                                        |               |
| 30 | Background and            | <a href="#">#6a</a> | Description of research question and justification     | 5-6           |
| 31 | rationale                 |                     | for undertaking the trial, including summary of        |               |
| 32 |                           |                     | relevant studies (published and unpublished)           |               |
| 33 |                           |                     | examining benefits and harms for each                  |               |
| 34 |                           |                     | intervention                                           |               |
| 35 |                           |                     |                                                        |               |
| 36 |                           |                     |                                                        |               |
| 37 |                           |                     |                                                        |               |
| 38 | Background and            | <a href="#">#6b</a> | Explanation for choice of comparators                  | 6             |
| 39 | rationale: choice of      |                     |                                                        |               |
| 40 | comparators               |                     |                                                        |               |
| 41 |                           |                     |                                                        |               |
| 42 |                           |                     |                                                        |               |
| 43 | Objectives                | <a href="#">#7</a>  | Specific objectives or hypotheses                      | 6             |
| 44 |                           |                     |                                                        |               |
| 45 |                           |                     |                                                        |               |
| 46 | Trial design              | <a href="#">#8</a>  | Description of trial design including type of trial    | 6             |
| 47 |                           |                     | (eg, parallel group, crossover, factorial, single      |               |
| 48 |                           |                     | group), allocation ratio, and framework (eg,           |               |
| 49 |                           |                     | superiority, equivalence, non-inferiority,             |               |
| 50 |                           |                     | exploratory)                                           |               |
| 51 |                           |                     |                                                        |               |
| 52 |                           |                     |                                                        |               |
| 53 |                           |                     |                                                        |               |
| 54 | <b>Methods:</b>           |                     |                                                        |               |
| 55 | <b>Participants,</b>      |                     |                                                        |               |
| 56 | <b>interventions, and</b> |                     |                                                        |               |
| 57 | <b>outcomes</b>           |                     |                                                        |               |
| 58 |                           |                     |                                                        |               |
| 59 |                           |                     |                                                        |               |
| 60 |                           |                     |                                                        |               |

|    |                      |                      |                                                                                                                                                                                                                                                                                                                                                                                |                 |
|----|----------------------|----------------------|--------------------------------------------------------------------------------------------------------------------------------------------------------------------------------------------------------------------------------------------------------------------------------------------------------------------------------------------------------------------------------|-----------------|
| 1  | Study setting        | <a href="#">#9</a>   | Description of study settings (eg, community clinic, academic hospital) and list of countries where data will be collected. Reference to where list of study sites can be obtained                                                                                                                                                                                             | 6               |
| 2  |                      |                      |                                                                                                                                                                                                                                                                                                                                                                                |                 |
| 3  |                      |                      |                                                                                                                                                                                                                                                                                                                                                                                |                 |
| 4  |                      |                      |                                                                                                                                                                                                                                                                                                                                                                                |                 |
| 5  |                      |                      |                                                                                                                                                                                                                                                                                                                                                                                |                 |
| 6  |                      |                      |                                                                                                                                                                                                                                                                                                                                                                                |                 |
| 7  |                      |                      |                                                                                                                                                                                                                                                                                                                                                                                |                 |
| 8  | Eligibility criteria | <a href="#">#10</a>  | Inclusion and exclusion criteria for participants. If applicable, eligibility criteria for study centres and individuals who will perform the interventions (eg, surgeons, psychotherapists)                                                                                                                                                                                   | 7               |
| 9  |                      |                      |                                                                                                                                                                                                                                                                                                                                                                                |                 |
| 10 |                      |                      |                                                                                                                                                                                                                                                                                                                                                                                |                 |
| 11 |                      |                      |                                                                                                                                                                                                                                                                                                                                                                                |                 |
| 12 |                      |                      |                                                                                                                                                                                                                                                                                                                                                                                |                 |
| 13 |                      |                      |                                                                                                                                                                                                                                                                                                                                                                                |                 |
| 14 | Interventions:       | <a href="#">#11a</a> | Interventions for each group with sufficient detail to allow replication, including how and when they will be administered                                                                                                                                                                                                                                                     | 7               |
| 15 | description          |                      |                                                                                                                                                                                                                                                                                                                                                                                |                 |
| 16 |                      |                      |                                                                                                                                                                                                                                                                                                                                                                                |                 |
| 17 |                      |                      |                                                                                                                                                                                                                                                                                                                                                                                |                 |
| 18 |                      |                      |                                                                                                                                                                                                                                                                                                                                                                                |                 |
| 19 |                      |                      |                                                                                                                                                                                                                                                                                                                                                                                |                 |
| 20 | Interventions:       | <a href="#">#11b</a> | Criteria for discontinuing or modifying allocated interventions for a given trial participant (eg, drug dose change in response to harms, participant request, or improving / worsening disease)                                                                                                                                                                               | 10              |
| 21 | modifications        |                      |                                                                                                                                                                                                                                                                                                                                                                                |                 |
| 22 |                      |                      |                                                                                                                                                                                                                                                                                                                                                                                |                 |
| 23 |                      |                      |                                                                                                                                                                                                                                                                                                                                                                                |                 |
| 24 |                      |                      |                                                                                                                                                                                                                                                                                                                                                                                |                 |
| 25 |                      |                      |                                                                                                                                                                                                                                                                                                                                                                                |                 |
| 26 |                      |                      |                                                                                                                                                                                                                                                                                                                                                                                |                 |
| 27 | Interventions:       | <a href="#">#11c</a> | Strategies to improve adherence to intervention protocols, and any procedures for monitoring adherence (eg, drug tablet return; laboratory tests)                                                                                                                                                                                                                              | 8, 9            |
| 28 | adherence            |                      |                                                                                                                                                                                                                                                                                                                                                                                |                 |
| 29 |                      |                      |                                                                                                                                                                                                                                                                                                                                                                                |                 |
| 30 |                      |                      |                                                                                                                                                                                                                                                                                                                                                                                |                 |
| 31 |                      |                      |                                                                                                                                                                                                                                                                                                                                                                                |                 |
| 32 |                      |                      |                                                                                                                                                                                                                                                                                                                                                                                |                 |
| 33 |                      |                      |                                                                                                                                                                                                                                                                                                                                                                                |                 |
| 34 | Interventions:       | <a href="#">#11d</a> | Relevant concomitant care and interventions that are permitted or prohibited during the trial                                                                                                                                                                                                                                                                                  | 7               |
| 35 | concomitant care     |                      |                                                                                                                                                                                                                                                                                                                                                                                |                 |
| 36 |                      |                      |                                                                                                                                                                                                                                                                                                                                                                                |                 |
| 37 |                      |                      |                                                                                                                                                                                                                                                                                                                                                                                |                 |
| 38 | Outcomes             | <a href="#">#12</a>  | Primary, secondary, and other outcomes, including the specific measurement variable (eg, systolic blood pressure), analysis metric (eg, change from baseline, final value, time to event), method of aggregation (eg, median, proportion), and time point for each outcome. Explanation of the clinical relevance of chosen efficacy and harm outcomes is strongly recommended | 10              |
| 39 |                      |                      |                                                                                                                                                                                                                                                                                                                                                                                |                 |
| 40 |                      |                      |                                                                                                                                                                                                                                                                                                                                                                                |                 |
| 41 |                      |                      |                                                                                                                                                                                                                                                                                                                                                                                |                 |
| 42 |                      |                      |                                                                                                                                                                                                                                                                                                                                                                                |                 |
| 43 |                      |                      |                                                                                                                                                                                                                                                                                                                                                                                |                 |
| 44 |                      |                      |                                                                                                                                                                                                                                                                                                                                                                                |                 |
| 45 |                      |                      |                                                                                                                                                                                                                                                                                                                                                                                |                 |
| 46 |                      |                      |                                                                                                                                                                                                                                                                                                                                                                                |                 |
| 47 |                      |                      |                                                                                                                                                                                                                                                                                                                                                                                |                 |
| 48 |                      |                      |                                                                                                                                                                                                                                                                                                                                                                                |                 |
| 49 |                      |                      |                                                                                                                                                                                                                                                                                                                                                                                |                 |
| 50 | Participant timeline | <a href="#">#13</a>  | Time schedule of enrolment, interventions (including any run-ins and washouts), assessments, and visits for participants. A schematic diagram is highly recommended (see Figure)                                                                                                                                                                                               | 9-10 & Figure 3 |
| 51 |                      |                      |                                                                                                                                                                                                                                                                                                                                                                                |                 |
| 52 |                      |                      |                                                                                                                                                                                                                                                                                                                                                                                |                 |
| 53 |                      |                      |                                                                                                                                                                                                                                                                                                                                                                                |                 |
| 54 |                      |                      |                                                                                                                                                                                                                                                                                                                                                                                |                 |
| 55 |                      |                      |                                                                                                                                                                                                                                                                                                                                                                                |                 |
| 56 |                      |                      |                                                                                                                                                                                                                                                                                                                                                                                |                 |
| 57 |                      |                      |                                                                                                                                                                                                                                                                                                                                                                                |                 |
| 58 |                      |                      |                                                                                                                                                                                                                                                                                                                                                                                |                 |
| 59 |                      |                      |                                                                                                                                                                                                                                                                                                                                                                                |                 |
| 60 |                      |                      |                                                                                                                                                                                                                                                                                                                                                                                |                 |



|    |                           |                      |                                                        |               |
|----|---------------------------|----------------------|--------------------------------------------------------|---------------|
| 1  | Sample size               | <a href="#">#14</a>  | Estimated number of participants needed to             | 10            |
| 2  |                           |                      | achieve study objectives and how it was                |               |
| 3  |                           |                      | determined, including clinical and statistical         |               |
| 4  |                           |                      | assumptions supporting any sample size                 |               |
| 5  |                           |                      | calculations                                           |               |
| 6  |                           |                      |                                                        |               |
| 7  |                           |                      |                                                        |               |
| 8  |                           |                      |                                                        |               |
| 9  | Recruitment               | <a href="#">#15</a>  | Strategies for achieving adequate participant          | 6 &           |
| 10 |                           |                      | enrolment to reach target sample size                  | supplementary |
| 11 |                           |                      |                                                        | material      |
| 12 |                           |                      |                                                        |               |
| 13 |                           |                      |                                                        |               |
| 14 | <b>Methods:</b>           |                      |                                                        |               |
| 15 | <b>Assignment of</b>      |                      |                                                        |               |
| 16 | <b>interventions (for</b> |                      |                                                        |               |
| 17 | <b>controlled trials)</b> |                      |                                                        |               |
| 18 |                           |                      |                                                        |               |
| 19 |                           |                      |                                                        |               |
| 20 |                           |                      |                                                        |               |
| 21 | Allocation: sequence      | <a href="#">#16a</a> | Method of generating the allocation sequence (eg,      | 7             |
| 22 | generation                |                      | computer-generated random numbers), and list of        |               |
| 23 |                           |                      | any factors for stratification. To reduce              |               |
| 24 |                           |                      | predictability of a random sequence, details of any    |               |
| 25 |                           |                      | planned restriction (eg, blocking) should be           |               |
| 26 |                           |                      | provided in a separate document that is                |               |
| 27 |                           |                      | unavailable to those who enrol participants or         |               |
| 28 |                           |                      | assign interventions                                   |               |
| 29 |                           |                      |                                                        |               |
| 30 |                           |                      |                                                        |               |
| 31 |                           |                      |                                                        |               |
| 32 |                           |                      |                                                        |               |
| 33 |                           |                      |                                                        |               |
| 34 | Allocation                | <a href="#">#16b</a> | Mechanism of implementing the allocation               | Supplementary |
| 35 | concealment               |                      | sequence (eg, central telephone; sequentially          | material      |
| 36 | mechanism                 |                      | numbered, opaque, sealed envelopes), describing        |               |
| 37 |                           |                      | any steps to conceal the sequence until                |               |
| 38 |                           |                      | interventions are assigned                             |               |
| 39 |                           |                      |                                                        |               |
| 40 |                           |                      |                                                        |               |
| 41 |                           |                      |                                                        |               |
| 42 | Allocation:               | <a href="#">#16c</a> | Who will generate the allocation sequence, who         | Supplementary |
| 43 | implementation            |                      | will enrol participants, and who will assign           | material      |
| 44 |                           |                      | participants to interventions                          |               |
| 45 |                           |                      |                                                        |               |
| 46 |                           |                      |                                                        |               |
| 47 |                           |                      |                                                        |               |
| 48 | Blinding (masking)        | <a href="#">#17a</a> | Who will be blinded after assignment to                | Supplementary |
| 49 |                           |                      | interventions (eg, trial participants, care providers, | material      |
| 50 |                           |                      | outcome assessors, data analysts), and how             |               |
| 51 |                           |                      |                                                        |               |
| 52 |                           |                      |                                                        |               |
| 53 | Blinding (masking):       | <a href="#">#17b</a> | If blinded, circumstances under which unblinding       | N/A           |
| 54 | emergency                 |                      | is permissible, and procedure for revealing a          |               |
| 55 | unblinding                |                      | participant's allocated intervention during the trial  |               |
| 56 |                           |                      |                                                        |               |
| 57 |                           |                      |                                                        |               |
| 58 |                           |                      |                                                        |               |
| 59 |                           |                      |                                                        |               |
| 60 |                           |                      |                                                        |               |

1 **Methods: Data**  
 2 **collection,**  
 3 **management, and**  
 4 **analysis**

|    |                                                  |                      |                                                                                                                                                                                                                                                                                                                                                                                                                                                                 |
|----|--------------------------------------------------|----------------------|-----------------------------------------------------------------------------------------------------------------------------------------------------------------------------------------------------------------------------------------------------------------------------------------------------------------------------------------------------------------------------------------------------------------------------------------------------------------|
| 5  |                                                  |                      |                                                                                                                                                                                                                                                                                                                                                                                                                                                                 |
| 6  |                                                  |                      |                                                                                                                                                                                                                                                                                                                                                                                                                                                                 |
| 7  |                                                  |                      |                                                                                                                                                                                                                                                                                                                                                                                                                                                                 |
| 8  | Data collection plan                             | <a href="#">#18a</a> | Plans for assessment and collection of outcome, 8-9<br>9 baseline, and other trial data, including any<br>10 related processes to promote data quality (eg,<br>11 duplicate measurements, training of assessors)<br>12 and a description of study instruments (eg,<br>13 questionnaires, laboratory tests) along with their<br>14 reliability and validity, if known. Reference to<br>15 where data collection forms can be found, if not in<br>16 the protocol |
| 17 |                                                  |                      |                                                                                                                                                                                                                                                                                                                                                                                                                                                                 |
| 18 | Data collection plan: retention                  | <a href="#">#18b</a> | Plans to promote participant retention and N/A<br>23 complete follow-up, including list of any outcome<br>24 data to be collected for participants who<br>25 discontinue or deviate from intervention protocols                                                                                                                                                                                                                                                 |
| 26 |                                                  |                      |                                                                                                                                                                                                                                                                                                                                                                                                                                                                 |
| 27 |                                                  |                      |                                                                                                                                                                                                                                                                                                                                                                                                                                                                 |
| 28 |                                                  |                      |                                                                                                                                                                                                                                                                                                                                                                                                                                                                 |
| 29 | Data management                                  | <a href="#">#19</a>  | Plans for data entry, coding, security, and storage, 8 &<br>30 including any related processes to promote data<br>31 quality (eg, double data entry; range checks for<br>32 data values). Reference to where details of data<br>33 management procedures can be found, if not in<br>34 the protocol<br>35<br>36<br>37<br>38<br>Supplementary material                                                                                                           |
| 39 | Statistics: outcomes                             | <a href="#">#20a</a> | Statistical methods for analysing primary and 10<br>40 secondary outcomes. Reference to where other<br>41 details of the statistical analysis plan can be<br>42 found, if not in the protocol                                                                                                                                                                                                                                                                   |
| 43 |                                                  |                      |                                                                                                                                                                                                                                                                                                                                                                                                                                                                 |
| 44 |                                                  |                      |                                                                                                                                                                                                                                                                                                                                                                                                                                                                 |
| 45 | Statistics: additional analyses                  | <a href="#">#20b</a> | Methods for any additional analyses (eg, N/A<br>46 subgroup and adjusted analyses)                                                                                                                                                                                                                                                                                                                                                                              |
| 47 |                                                  |                      |                                                                                                                                                                                                                                                                                                                                                                                                                                                                 |
| 48 |                                                  |                      |                                                                                                                                                                                                                                                                                                                                                                                                                                                                 |
| 49 | Statistics: analysis population and missing data | <a href="#">#20c</a> | Definition of analysis population relating to N/A<br>50 protocol non-adherence (eg, as randomised<br>51 analysis), and any statistical methods to handle<br>52 missing data (eg, multiple imputation)                                                                                                                                                                                                                                                           |
| 53 |                                                  |                      |                                                                                                                                                                                                                                                                                                                                                                                                                                                                 |
| 54 |                                                  |                      |                                                                                                                                                                                                                                                                                                                                                                                                                                                                 |
| 55 |                                                  |                      |                                                                                                                                                                                                                                                                                                                                                                                                                                                                 |

56 **Methods:**  
 57 **Monitoring**

|    |                      |                      |                                                      |               |
|----|----------------------|----------------------|------------------------------------------------------|---------------|
| 1  | Data monitoring:     | <a href="#">#21a</a> | Composition of data monitoring committee (DMC);      | Supplementary |
| 2  | formal committee     |                      | summary of its role and reporting structure;         | material      |
| 3  |                      |                      | statement of whether it is independent from the      |               |
| 4  |                      |                      | sponsor and competing interests; and reference to    |               |
| 5  |                      |                      | where further details about its charter can be       |               |
| 6  |                      |                      | found, if not in the protocol. Alternatively, an     |               |
| 7  |                      |                      | explanation of why a DMC is not needed               |               |
| 8  |                      |                      |                                                      |               |
| 9  |                      |                      |                                                      |               |
| 10 |                      |                      |                                                      |               |
| 11 |                      |                      |                                                      |               |
| 12 | Data monitoring:     | <a href="#">#21b</a> | Description of any interim analyses and stopping     | N/A           |
| 13 | interim analysis     |                      | guidelines, including who will have access to        |               |
| 14 |                      |                      | these interim results and make the final decision    |               |
| 15 |                      |                      | to terminate the trial                               |               |
| 16 |                      |                      |                                                      |               |
| 17 |                      |                      |                                                      |               |
| 18 |                      |                      |                                                      |               |
| 19 | Harms                | <a href="#">#22</a>  | Plans for collecting, assessing, reporting, and      | N/A           |
| 20 |                      |                      | managing solicited and spontaneously reported        |               |
| 21 |                      |                      | adverse events and other unintended effects of       |               |
| 22 |                      |                      | trial interventions or trial conduct                 |               |
| 23 |                      |                      |                                                      |               |
| 24 |                      |                      |                                                      |               |
| 25 |                      |                      |                                                      |               |
| 26 | Auditing             | <a href="#">#23</a>  | Frequency and procedures for auditing trial          | N/A           |
| 27 |                      |                      | conduct, if any, and whether the process will be     |               |
| 28 |                      |                      | independent from investigators and the sponsor       |               |
| 29 |                      |                      |                                                      |               |
| 30 |                      |                      |                                                      |               |
| 31 | <b>Ethics and</b>    |                      |                                                      |               |
| 32 | <b>dissemination</b> |                      |                                                      |               |
| 33 |                      |                      |                                                      |               |
| 34 |                      |                      |                                                      |               |
| 35 | Research ethics      | <a href="#">#24</a>  | Plans for seeking research ethics committee /        | 10-11         |
| 36 | approval             |                      | institutional review board (REC / IRB) approval      |               |
| 37 |                      |                      |                                                      |               |
| 38 |                      |                      |                                                      |               |
| 39 | Protocol             | <a href="#">#25</a>  | Plans for communicating important protocol           | N/A           |
| 40 | amendments           |                      | modifications (eg, changes to eligibility criteria,  |               |
| 41 |                      |                      | outcomes, analyses) to relevant parties (eg,         |               |
| 42 |                      |                      | investigators, REC / IRBs, trial participants, trial |               |
| 43 |                      |                      | registries, journals, regulators)                    |               |
| 44 |                      |                      |                                                      |               |
| 45 |                      |                      |                                                      |               |
| 46 |                      |                      |                                                      |               |
| 47 | Consent or assent    | <a href="#">#26a</a> | Who will obtain informed consent or assent from      | 11            |
| 48 |                      |                      | potential trial participants or authorised           |               |
| 49 |                      |                      | surrogates, and how (see Item 32)                    |               |
| 50 |                      |                      |                                                      |               |
| 51 |                      |                      |                                                      |               |
| 52 | Consent or assent:   | <a href="#">#26b</a> | Additional consent provisions for collection and     | N/A           |
| 53 | ancillary studies    |                      | use of participant data and biological specimens     |               |
| 54 |                      |                      | in ancillary studies, if applicable                  |               |
| 55 |                      |                      |                                                      |               |
| 56 |                      |                      |                                                      |               |
| 57 |                      |                      |                                                      |               |
| 58 |                      |                      |                                                      |               |
| 59 |                      |                      |                                                      |               |
| 60 |                      |                      |                                                      |               |

|    |                                             |                      |                                                                                                                                                                                                                                                                                     |                        |
|----|---------------------------------------------|----------------------|-------------------------------------------------------------------------------------------------------------------------------------------------------------------------------------------------------------------------------------------------------------------------------------|------------------------|
| 1  | Confidentiality                             | <a href="#">#27</a>  | How personal information about potential and enrolled participants will be collected, shared, and maintained in order to protect confidentiality before, during, and after the trial                                                                                                | Supplementary material |
| 2  |                                             |                      |                                                                                                                                                                                                                                                                                     |                        |
| 3  |                                             |                      |                                                                                                                                                                                                                                                                                     |                        |
| 4  |                                             |                      |                                                                                                                                                                                                                                                                                     |                        |
| 5  |                                             |                      |                                                                                                                                                                                                                                                                                     |                        |
| 6  |                                             |                      |                                                                                                                                                                                                                                                                                     |                        |
| 7  |                                             |                      |                                                                                                                                                                                                                                                                                     |                        |
| 8  | Declaration of interests                    | <a href="#">#28</a>  | Financial and other competing interests for principal investigators for the overall trial and each study site                                                                                                                                                                       | 14                     |
| 9  |                                             |                      |                                                                                                                                                                                                                                                                                     |                        |
| 10 |                                             |                      |                                                                                                                                                                                                                                                                                     |                        |
| 11 |                                             |                      |                                                                                                                                                                                                                                                                                     |                        |
| 12 |                                             |                      |                                                                                                                                                                                                                                                                                     |                        |
| 13 | Data access                                 | <a href="#">#29</a>  | Statement of who will have access to the final trial dataset, and disclosure of contractual agreements that limit such access for investigators                                                                                                                                     | Supplementary material |
| 14 |                                             |                      |                                                                                                                                                                                                                                                                                     |                        |
| 15 |                                             |                      |                                                                                                                                                                                                                                                                                     |                        |
| 16 |                                             |                      |                                                                                                                                                                                                                                                                                     |                        |
| 17 |                                             |                      |                                                                                                                                                                                                                                                                                     |                        |
| 18 | Ancillary and post trial care               | <a href="#">#30</a>  | Provisions, if any, for ancillary and post-trial care, and for compensation to those who suffer harm from trial participation                                                                                                                                                       | N/A                    |
| 19 |                                             |                      |                                                                                                                                                                                                                                                                                     |                        |
| 20 |                                             |                      |                                                                                                                                                                                                                                                                                     |                        |
| 21 |                                             |                      |                                                                                                                                                                                                                                                                                     |                        |
| 22 |                                             |                      |                                                                                                                                                                                                                                                                                     |                        |
| 23 |                                             |                      |                                                                                                                                                                                                                                                                                     |                        |
| 24 | Dissemination policy: trial results         | <a href="#">#31a</a> | Plans for investigators and sponsor to communicate trial results to participants, healthcare professionals, the public, and other relevant groups (eg, via publication, reporting in results databases, or other data sharing arrangements), including any publication restrictions | 11                     |
| 25 |                                             |                      |                                                                                                                                                                                                                                                                                     |                        |
| 26 |                                             |                      |                                                                                                                                                                                                                                                                                     |                        |
| 27 |                                             |                      |                                                                                                                                                                                                                                                                                     |                        |
| 28 |                                             |                      |                                                                                                                                                                                                                                                                                     |                        |
| 29 |                                             |                      |                                                                                                                                                                                                                                                                                     |                        |
| 30 |                                             |                      |                                                                                                                                                                                                                                                                                     |                        |
| 31 |                                             |                      |                                                                                                                                                                                                                                                                                     |                        |
| 32 |                                             |                      |                                                                                                                                                                                                                                                                                     |                        |
| 33 |                                             |                      |                                                                                                                                                                                                                                                                                     |                        |
| 34 |                                             |                      |                                                                                                                                                                                                                                                                                     |                        |
| 35 | Dissemination policy: authorship            | <a href="#">#31b</a> | Authorship eligibility guidelines and any intended use of professional writers                                                                                                                                                                                                      | 11                     |
| 36 |                                             |                      |                                                                                                                                                                                                                                                                                     |                        |
| 37 |                                             |                      |                                                                                                                                                                                                                                                                                     |                        |
| 38 |                                             |                      |                                                                                                                                                                                                                                                                                     |                        |
| 39 | Dissemination policy: reproducible research | <a href="#">#31c</a> | Plans, if any, for granting public access to the full protocol, participant-level dataset, and statistical code                                                                                                                                                                     | 12                     |
| 40 |                                             |                      |                                                                                                                                                                                                                                                                                     |                        |
| 41 |                                             |                      |                                                                                                                                                                                                                                                                                     |                        |
| 42 |                                             |                      |                                                                                                                                                                                                                                                                                     |                        |
| 43 |                                             |                      |                                                                                                                                                                                                                                                                                     |                        |
| 44 |                                             |                      |                                                                                                                                                                                                                                                                                     |                        |
| 45 |                                             |                      |                                                                                                                                                                                                                                                                                     |                        |
| 46 | <b>Appendices</b>                           |                      |                                                                                                                                                                                                                                                                                     |                        |
| 47 |                                             |                      |                                                                                                                                                                                                                                                                                     |                        |
| 48 |                                             |                      |                                                                                                                                                                                                                                                                                     |                        |
| 49 | Informed consent materials                  | <a href="#">#32</a>  | Model consent form and other related documentation given to participants and authorised surrogates                                                                                                                                                                                  | Supplementary material |
| 50 |                                             |                      |                                                                                                                                                                                                                                                                                     |                        |
| 51 |                                             |                      |                                                                                                                                                                                                                                                                                     |                        |
| 52 |                                             |                      |                                                                                                                                                                                                                                                                                     |                        |
| 53 |                                             |                      |                                                                                                                                                                                                                                                                                     |                        |
| 54 | Biological specimens                        | <a href="#">#33</a>  | Plans for collection, laboratory evaluation, and storage of biological specimens for genetic or molecular analysis in the current trial and for future use in ancillary studies, if applicable                                                                                      | N/A                    |
| 55 |                                             |                      |                                                                                                                                                                                                                                                                                     |                        |
| 56 |                                             |                      |                                                                                                                                                                                                                                                                                     |                        |
| 57 |                                             |                      |                                                                                                                                                                                                                                                                                     |                        |
| 58 |                                             |                      |                                                                                                                                                                                                                                                                                     |                        |
| 59 |                                             |                      |                                                                                                                                                                                                                                                                                     |                        |
| 60 |                                             |                      |                                                                                                                                                                                                                                                                                     |                        |

1 None The SPIRIT Explanation and Elaboration paper is distributed under the terms of the Creative  
2 Commons Attribution License CC-BY-NC. This checklist can be completed online using  
3 <https://www.goodreports.org/>, a tool made by the [EQUATOR Network](#) in collaboration with  
4 [Penelope.ai](#)  
5  
6  
7  
8  
9  
10  
11  
12  
13  
14  
15  
16  
17  
18  
19  
20  
21  
22  
23  
24  
25  
26  
27  
28  
29  
30  
31  
32  
33  
34  
35  
36  
37  
38  
39  
40  
41  
42  
43  
44  
45  
46  
47  
48  
49  
50  
51  
52  
53  
54  
55  
56  
57  
58  
59  
60

For peer review only
